# Supplementary material for: Metal free chemoselective reduction of α-keto amides using TBAF as catalyst
Source: Royal Society of Chemistry journal article supplement (doi:10.1039/c4ra13090a), 2014-01-01
Supplement: c4ra13090a1.pdf [file c4ra13090a1.pdf]

SUPPORTING INFORMATION

for

**Metal Free Chemoselective Reduction of  $\alpha$ -Keto Amides using TBAF as  
Catalyst**

N Chary Mamillapalli and G. Sekar\*

*Department of Chemistry, Indian Institute of Technology Madras, Chennai,*

*Tamil Nadu-600 036, India*

[gsekar@iitm.ac.in](mailto:gsekar@iitm.ac.in)

**Table of contents**

- $^1\text{H}$  and  $^{13}\text{C}$  spectra for all compounds 1

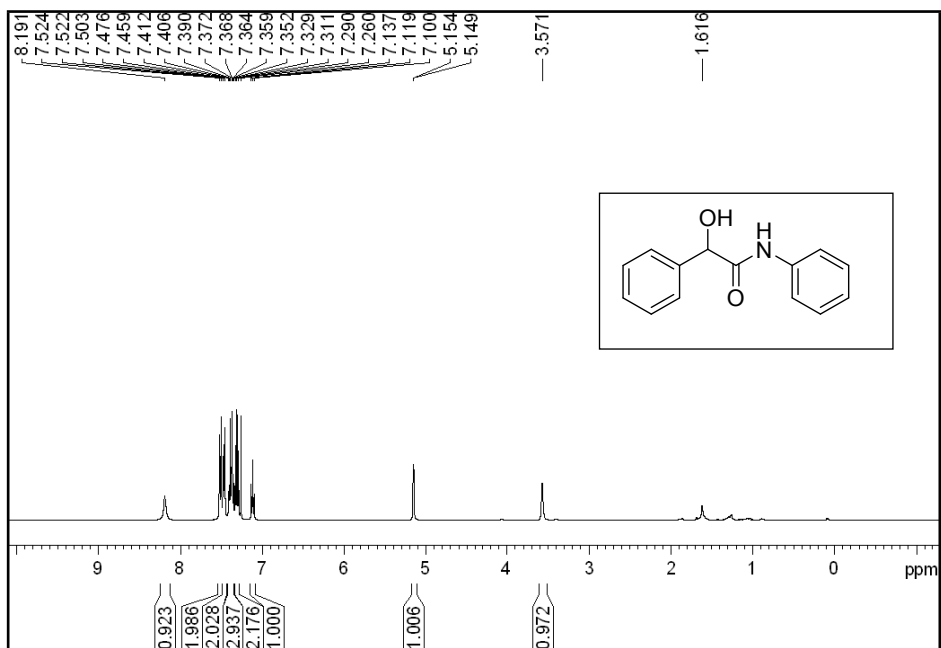

400 Mz  $^1\text{H}$ -NMR spectra of **2a** in  $\text{CDCl}_3$

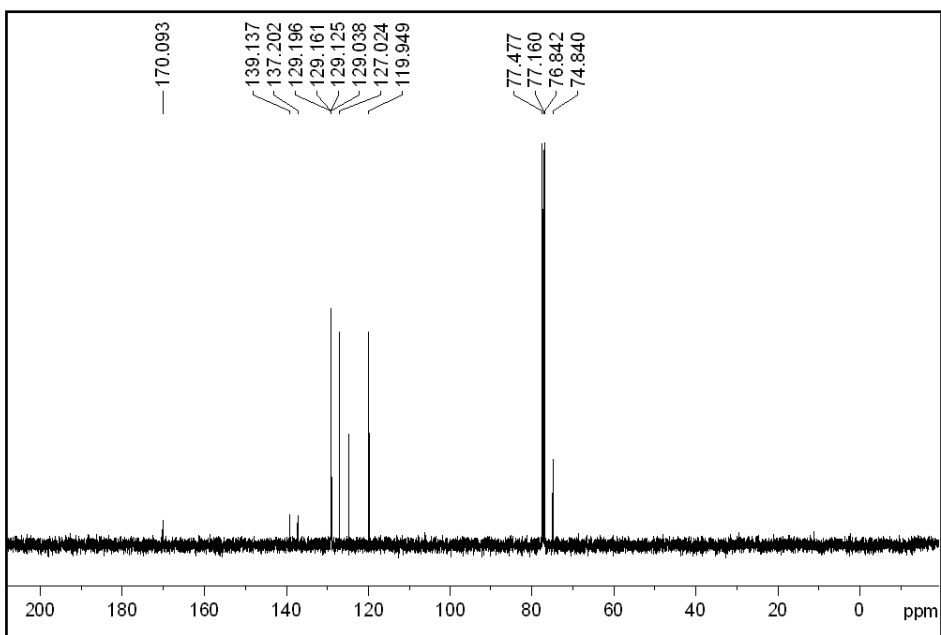

100 Mz  $^{13}\text{C}$ -NMR spectra of **2a** in  $\text{CDCl}_3$

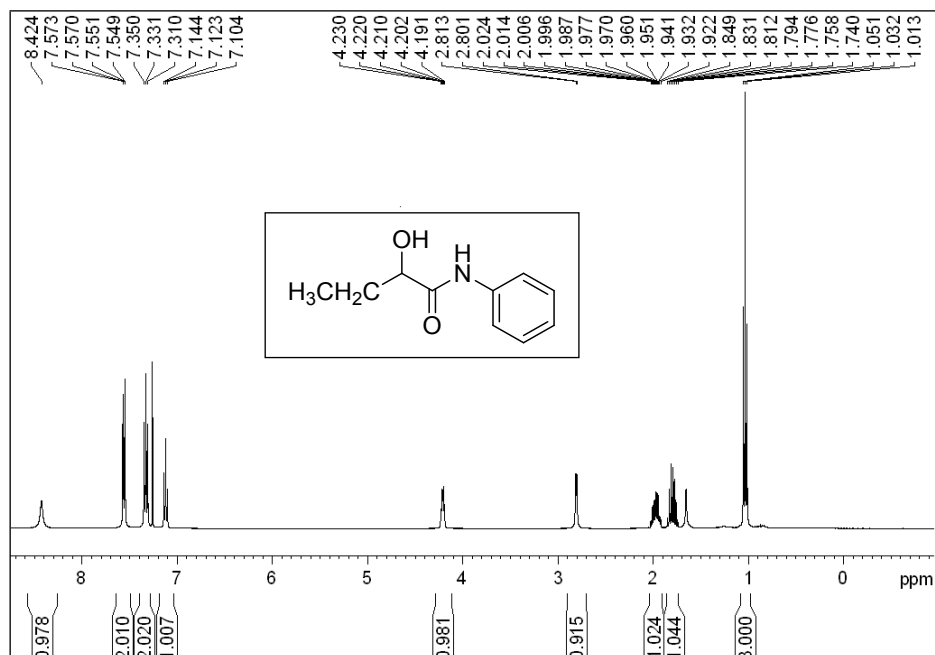

400 Mz  $^1\text{H}$ -NMR spectra of **2b** in  $\text{CDCl}_3$

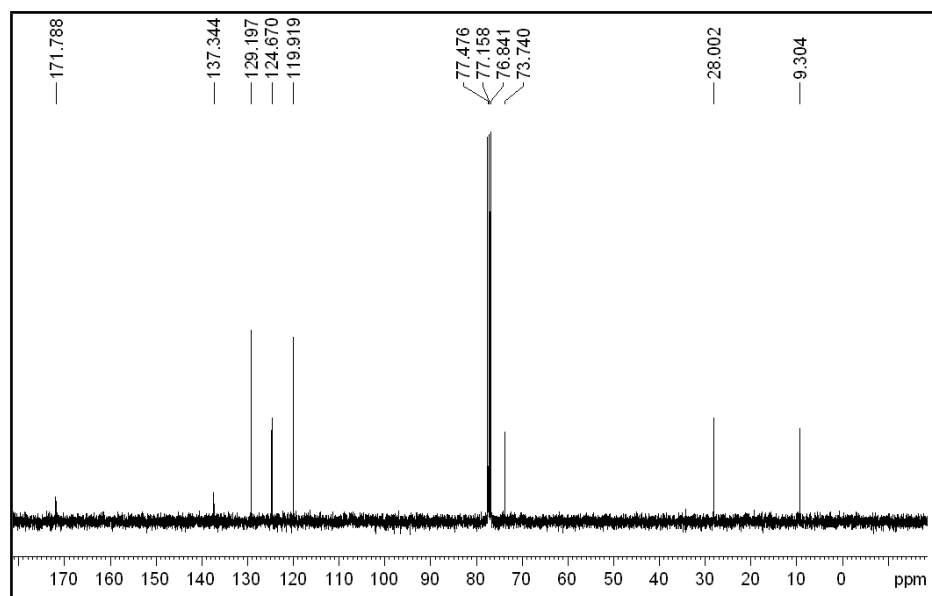

100 Mz  $^{13}\text{C}$ -NMR spectra of **2b** in  $\text{CDCl}_3$

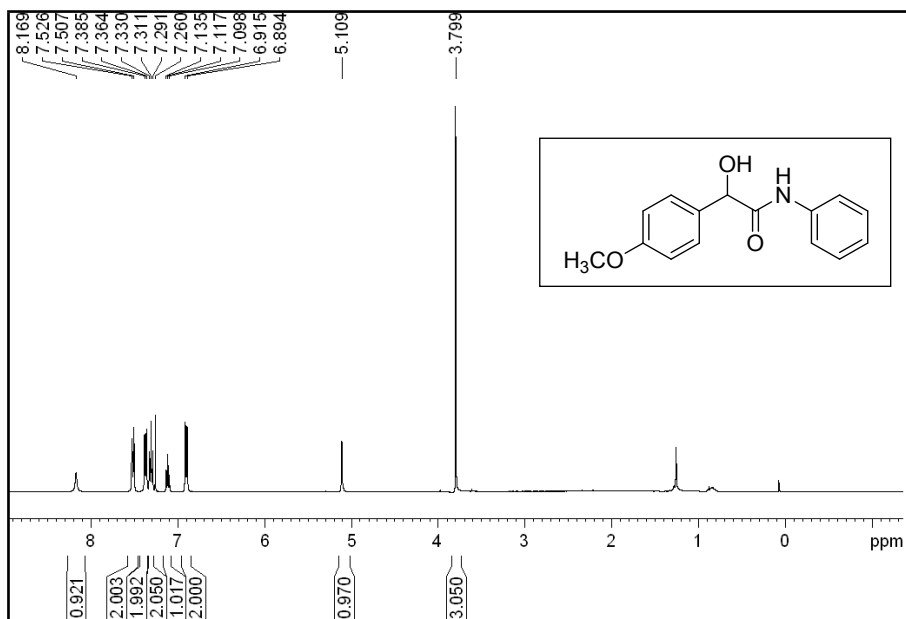

400 Mz  $^1\text{H}$ -NMR spectra of **2c** in  $\text{CDCl}_3$

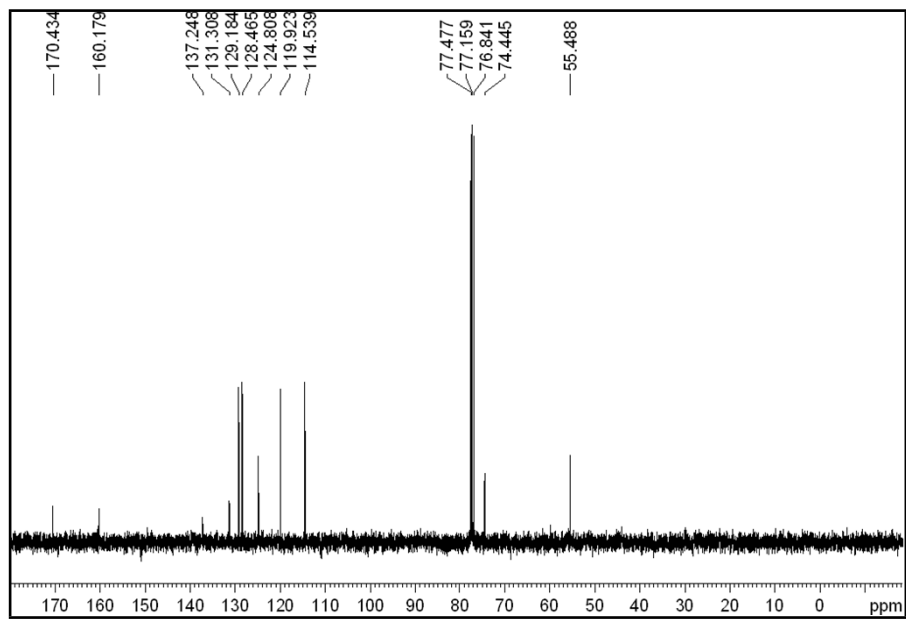

100 Mz  $^{13}\text{C}$ -NMR spectra of **2c** in  $\text{CDCl}_3$

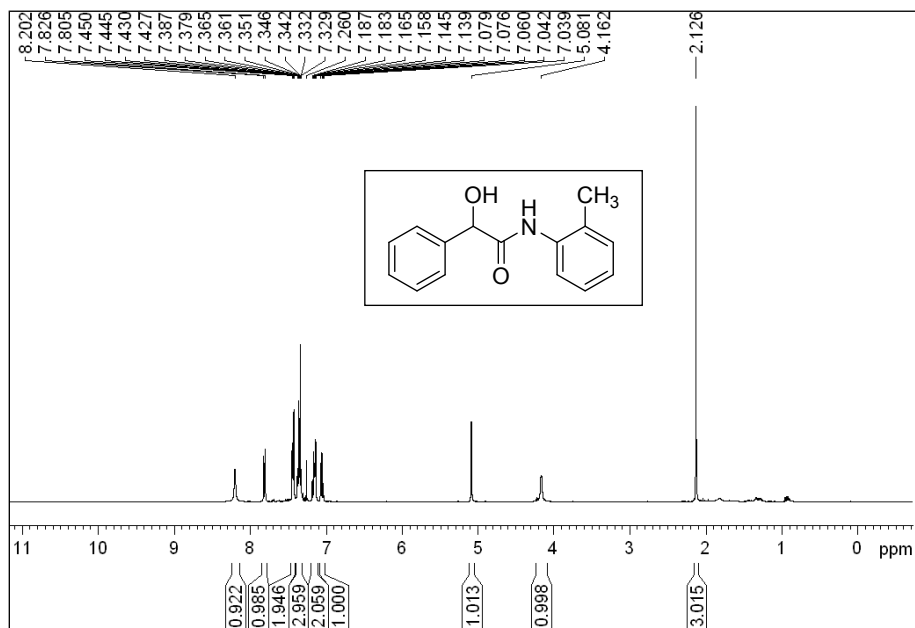

400 Mz  $^1\text{H-NMR}$  spectra of **2d** in  $\text{CDCl}_3$

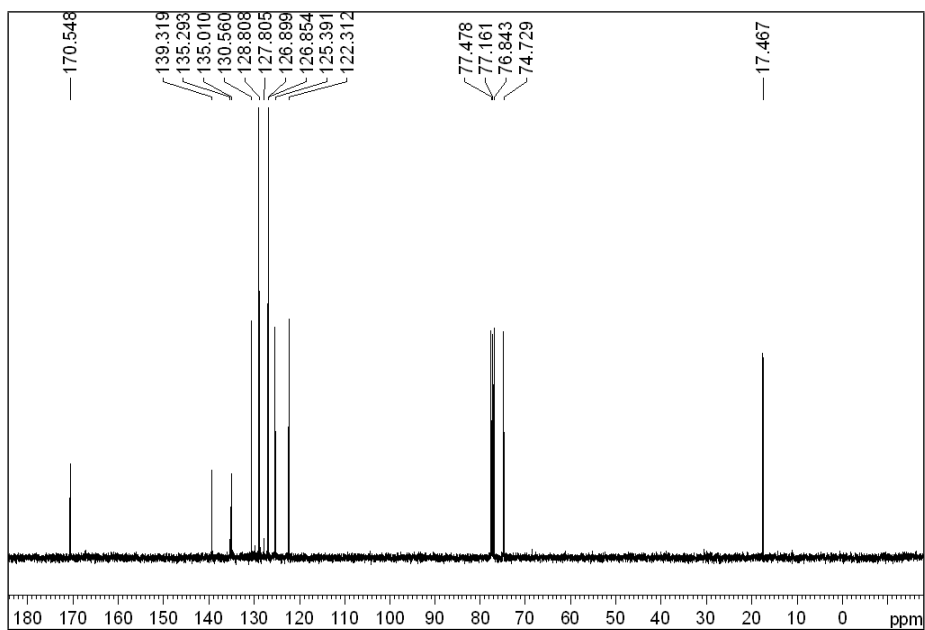

100 Mz  $^{13}\text{C-NMR}$  spectra of **2d** in  $\text{CDCl}_3$

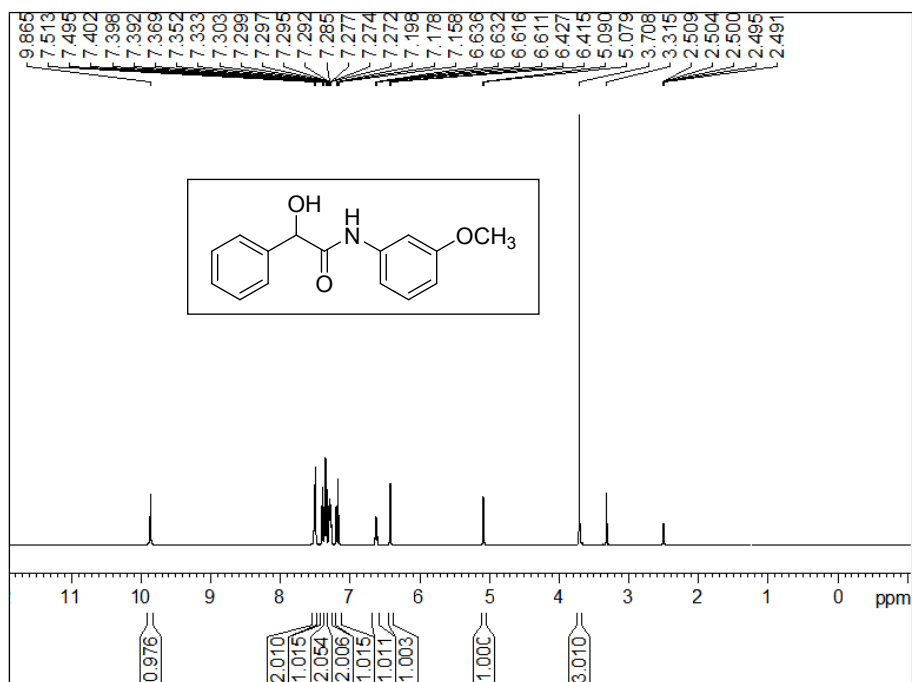

400 Mz  $^1\text{H}$ -NMR spectra of **2e** in  $\text{DMSO-}d_6$

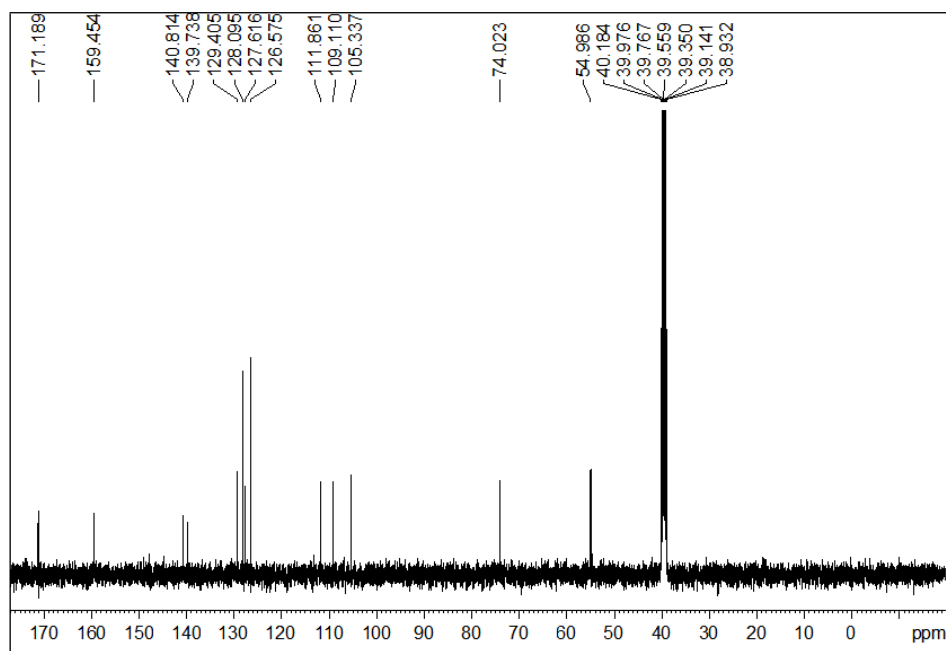

100 Mz  $^{13}\text{C}$ -NMR spectra of **2e** in  $\text{DMSO-}d_6$

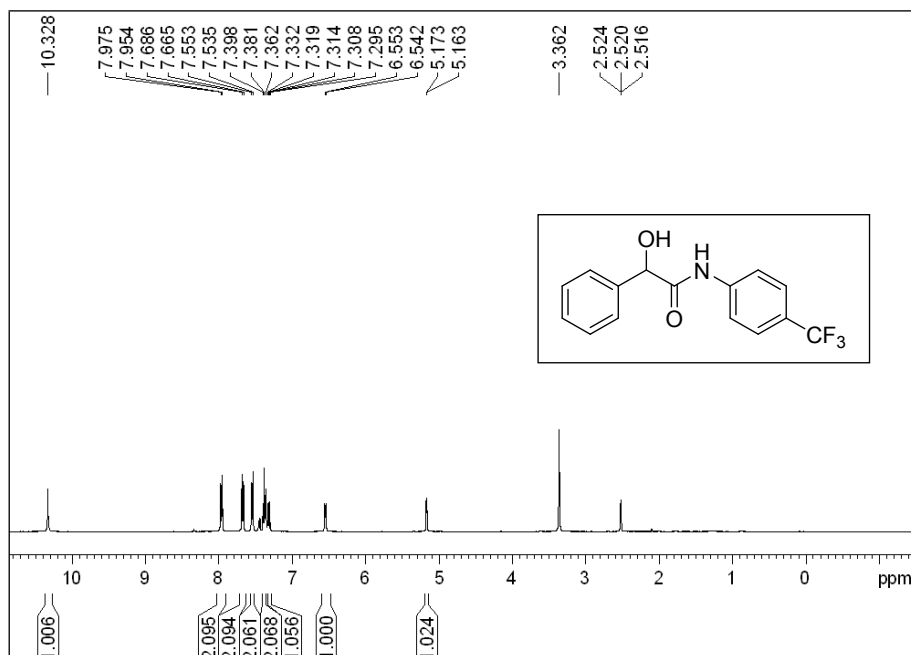

400 Mz  $^1\text{H}$ -NMR spectra of **2f** in  $\text{DMSO-}d_6$

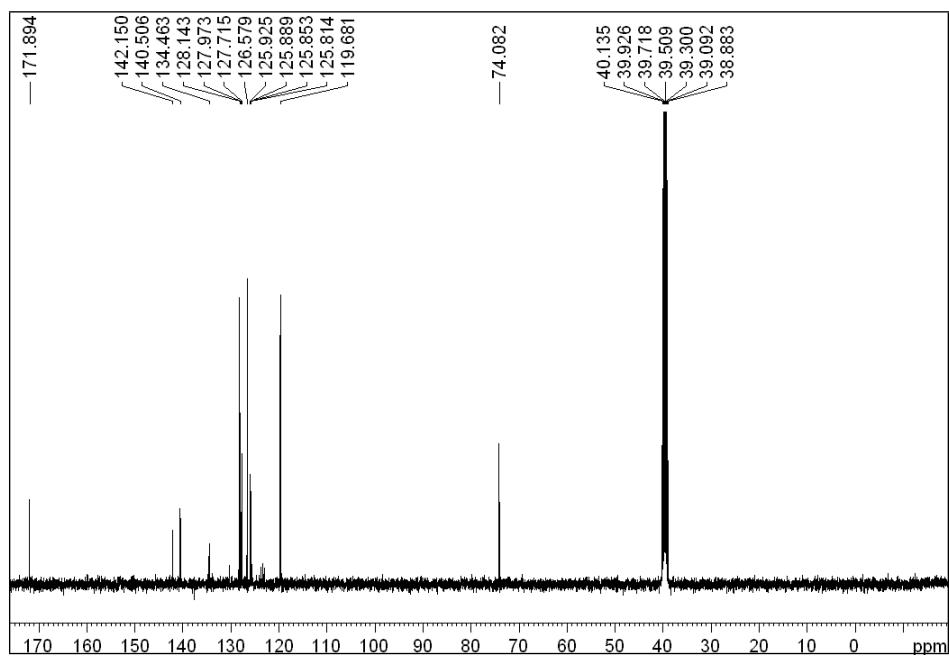

100 Mz  $^{13}\text{C}$ -NMR spectra of **2f** in  $\text{DMSO-}d_6$

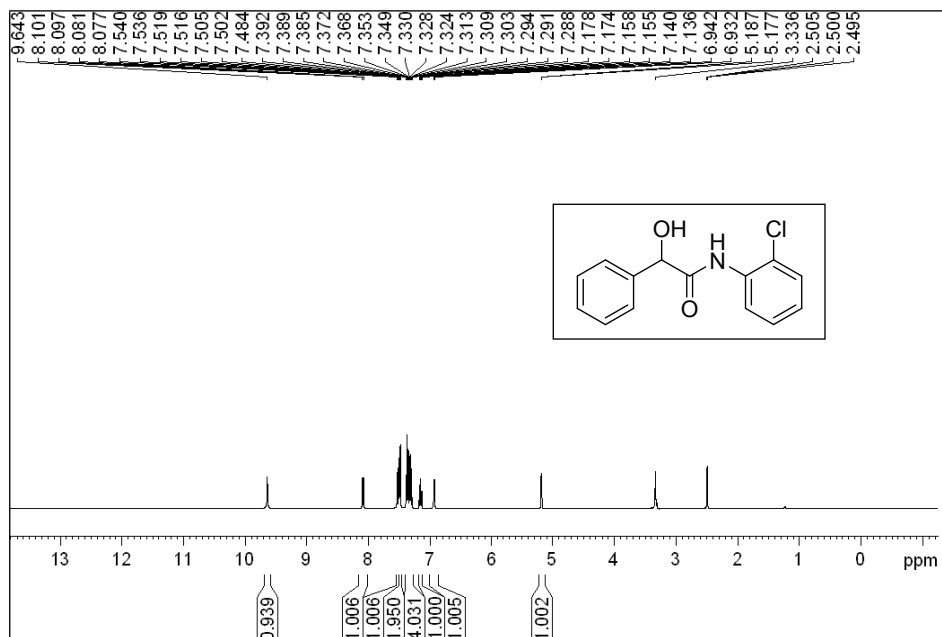

400 Mz  $^1\text{H}$ -NMR spectra of **2g** in  $\text{DMSO-}d_6$

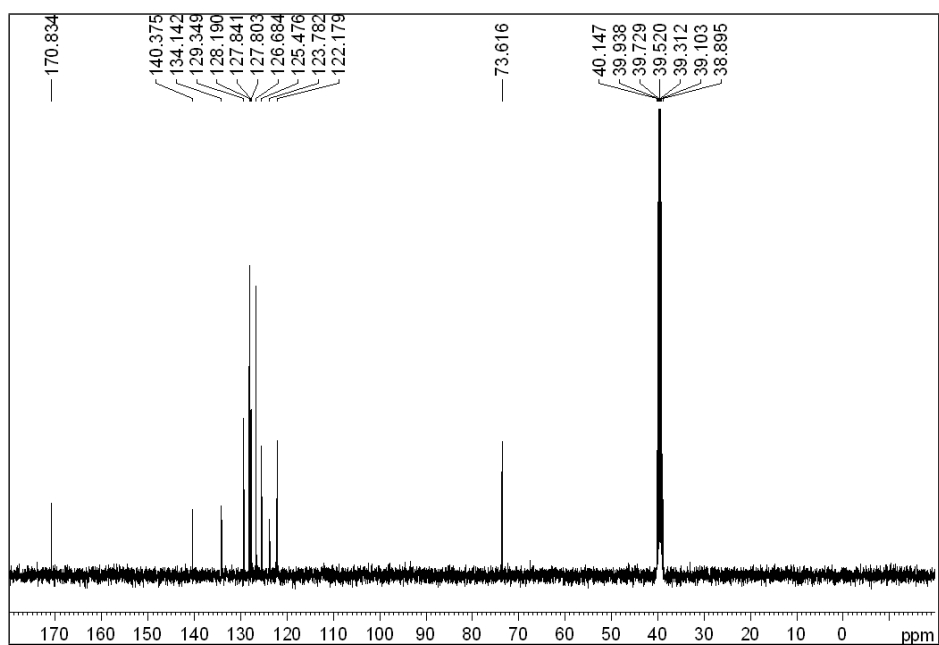

100 Mz  $^{13}\text{C}$ -NMR spectra of **2g** in  $\text{DMSO-}d_6$



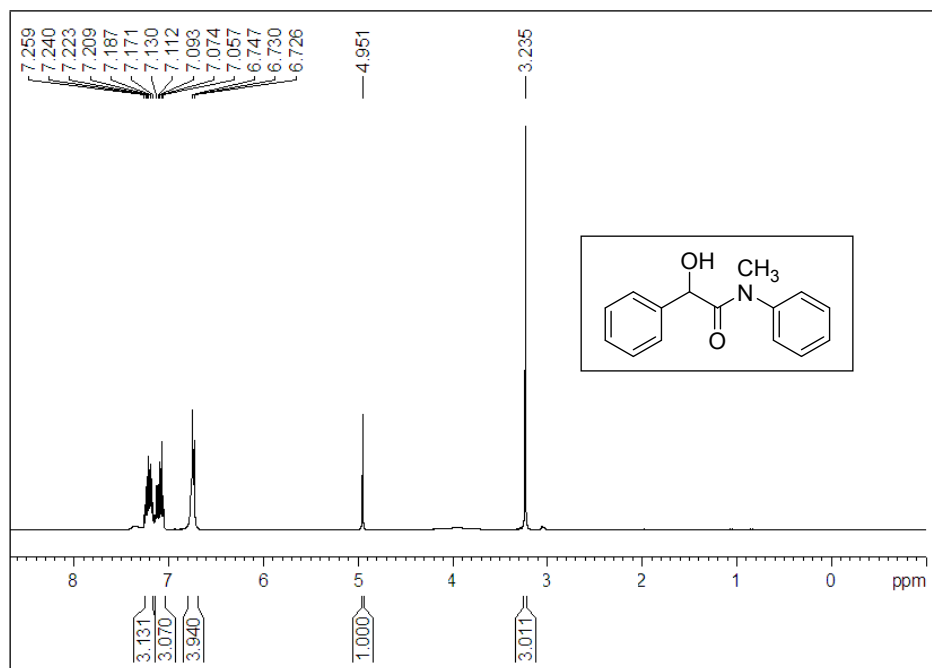

400 Mz  $^1\text{H}$ -NMR spectra of **2h** in  $\text{CDCl}_3$

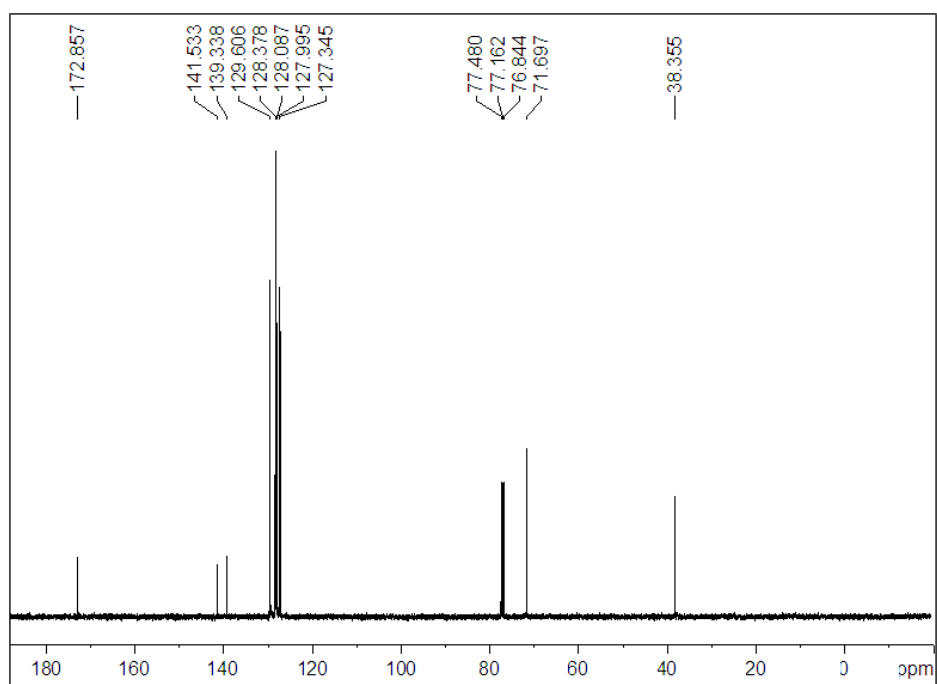

100 Mz  $^{13}\text{C}$ -NMR spectra of **2h** in  $\text{CDCl}_3$

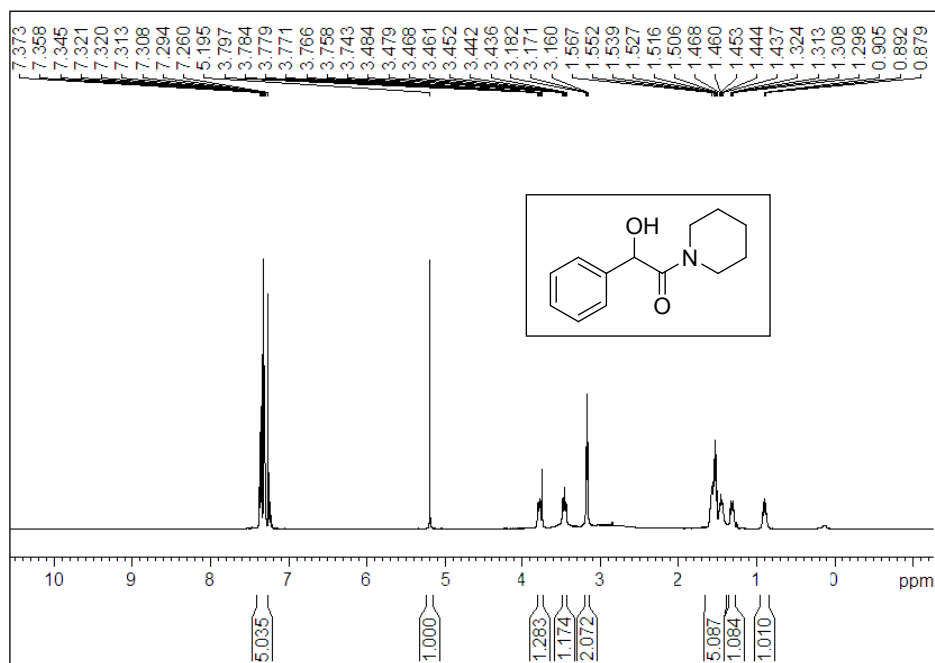

400 Mz  $^1\text{H}$ -NMR spectra of **2i** in  $\text{CDCl}_3$

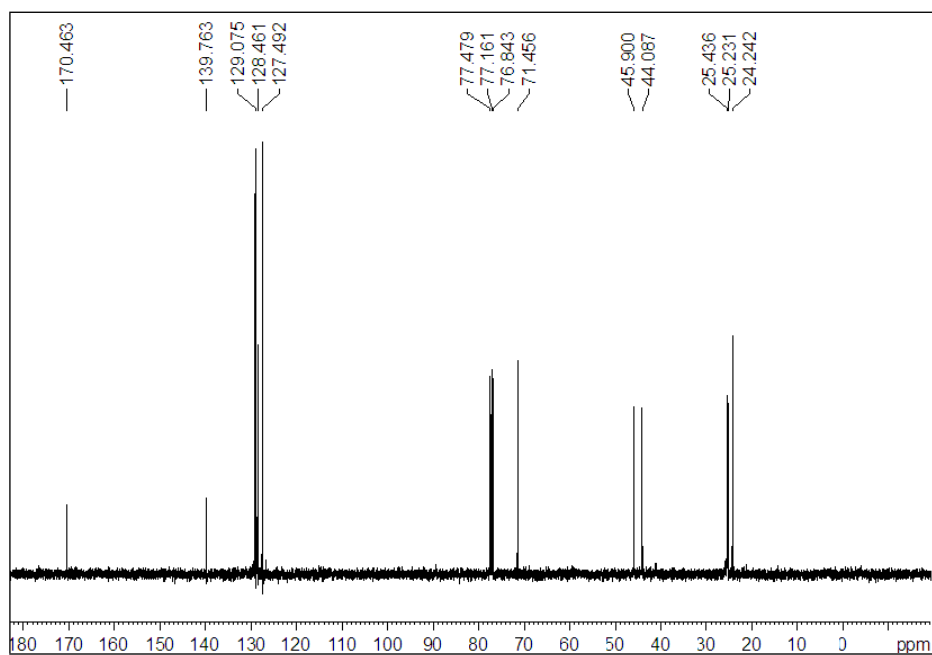

100 Mz  $^{13}\text{C}$ -NMR spectra of **2i** in  $\text{CDCl}_3$

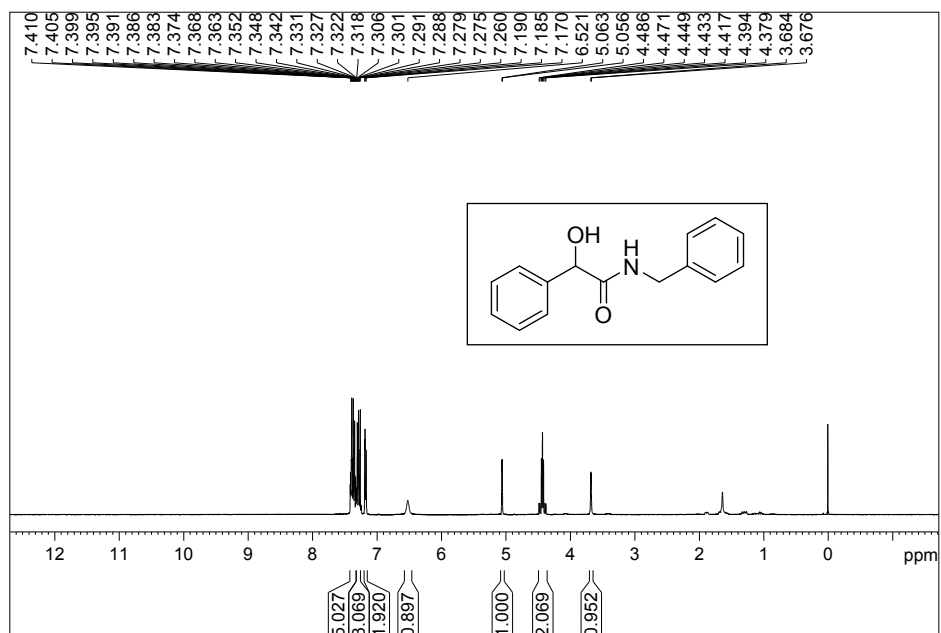

400 Mz  $^1\text{H}$ -NMR spectra of **2j** in  $\text{CDCl}_3$

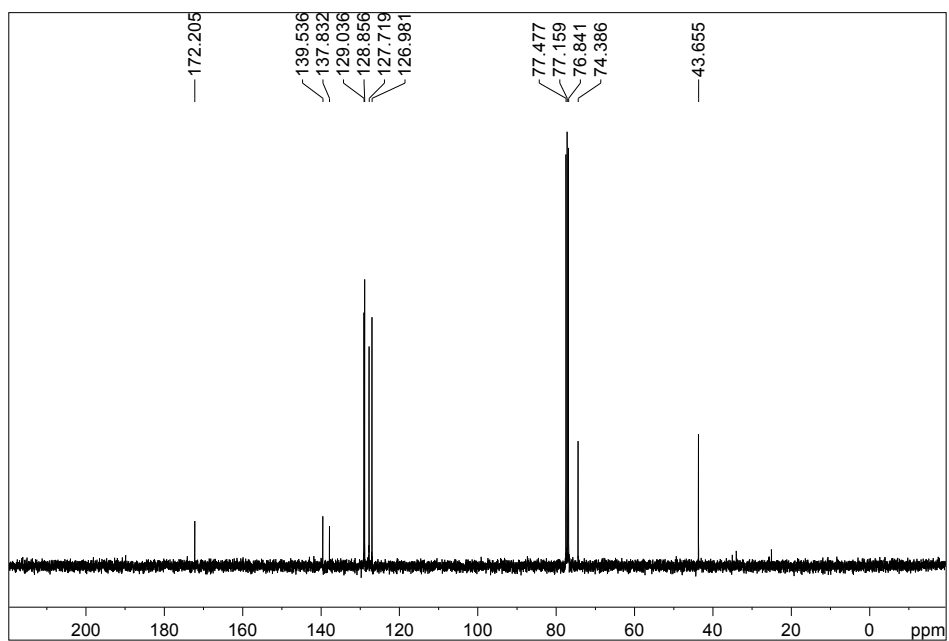

100 Mz  $^{13}\text{C}$ -NMR spectra of **2j** in  $\text{CDCl}_3$

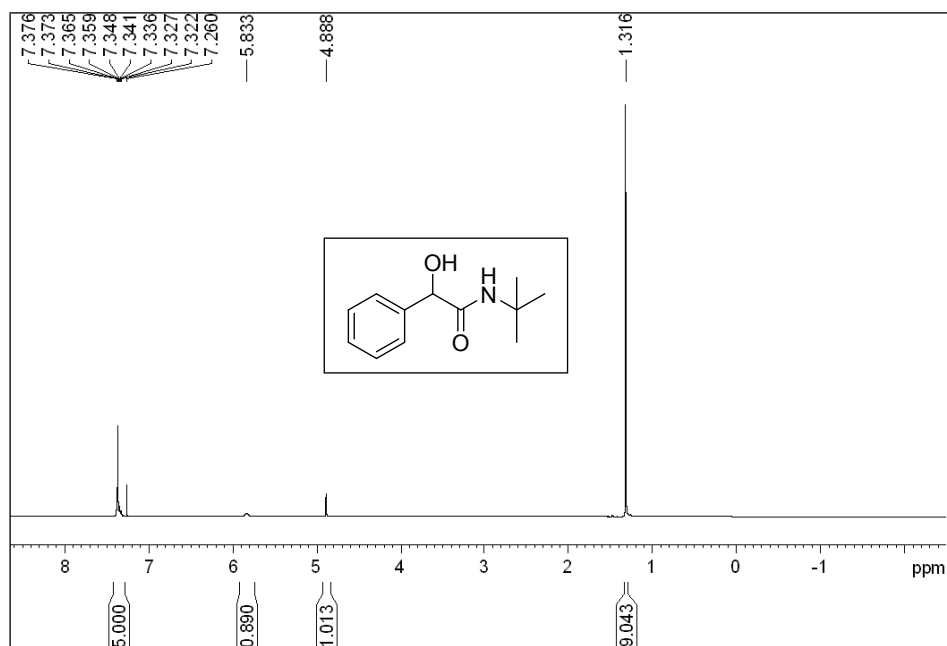

400 Mz  $^1\text{H-NMR}$  spectra of **2k** in  $\text{CDCl}_3$

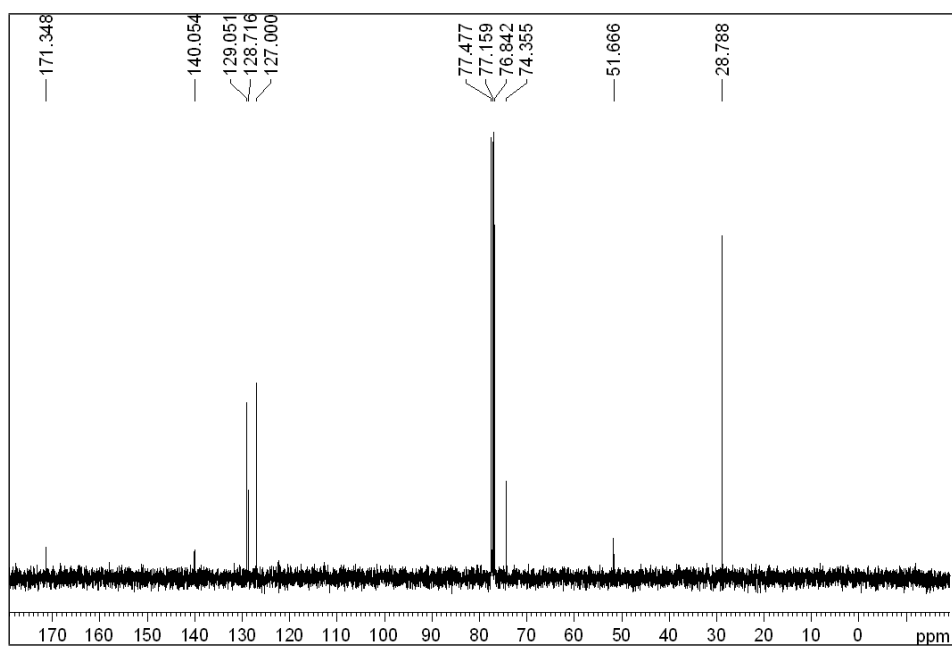

100 Mz  $^{13}\text{C-NMR}$  spectra of **2k** in  $\text{CDCl}_3$

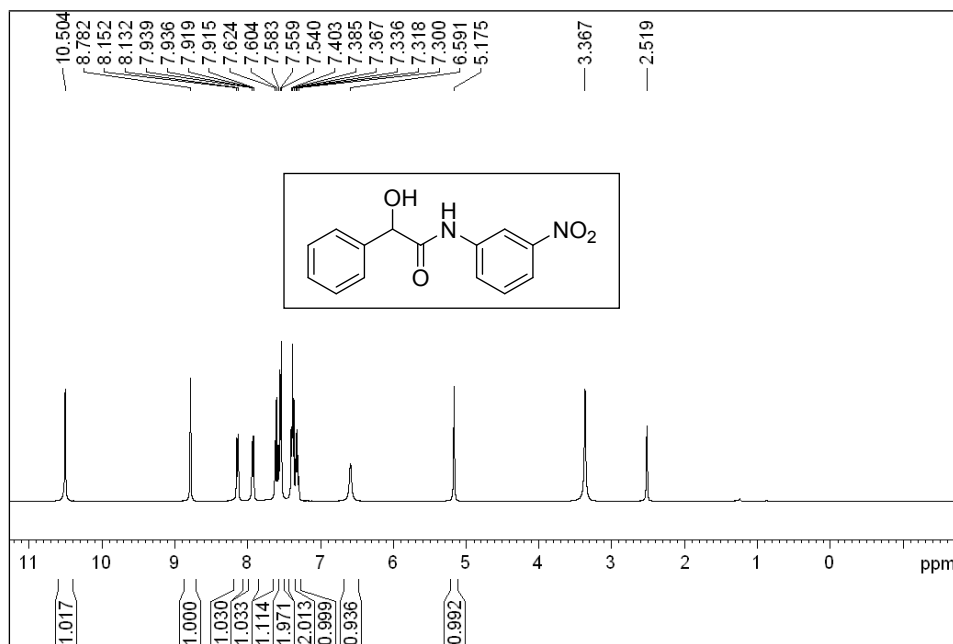

400 Mz  $^1\text{H}$ -NMR spectra of **21** in  $\text{DMSO-}d_6$

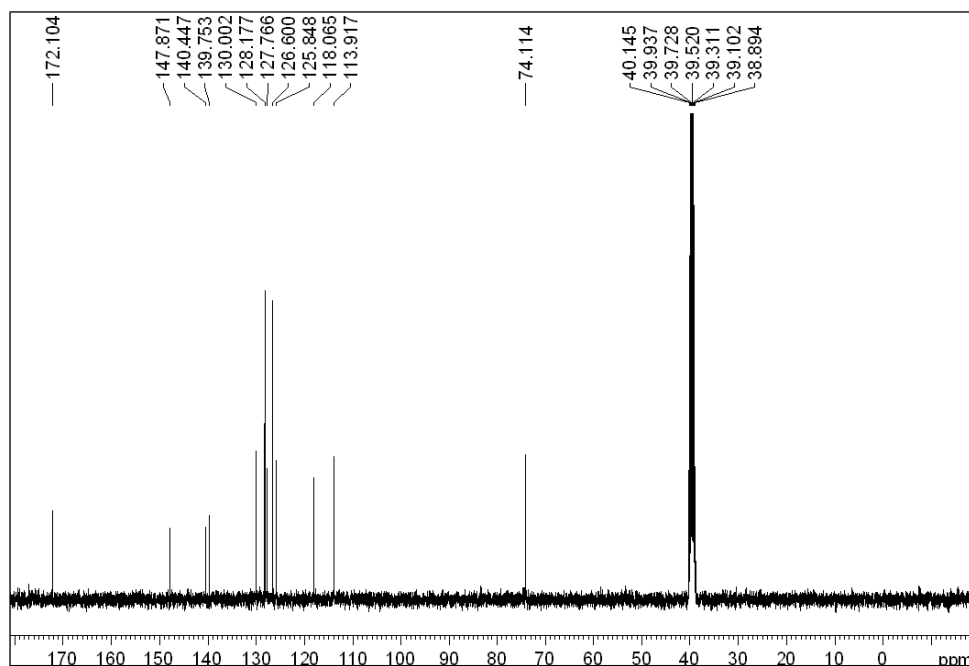

100 Mz  $^{13}\text{C}$ -NMR spectra of **21** in  $\text{DMSO-}d_6$

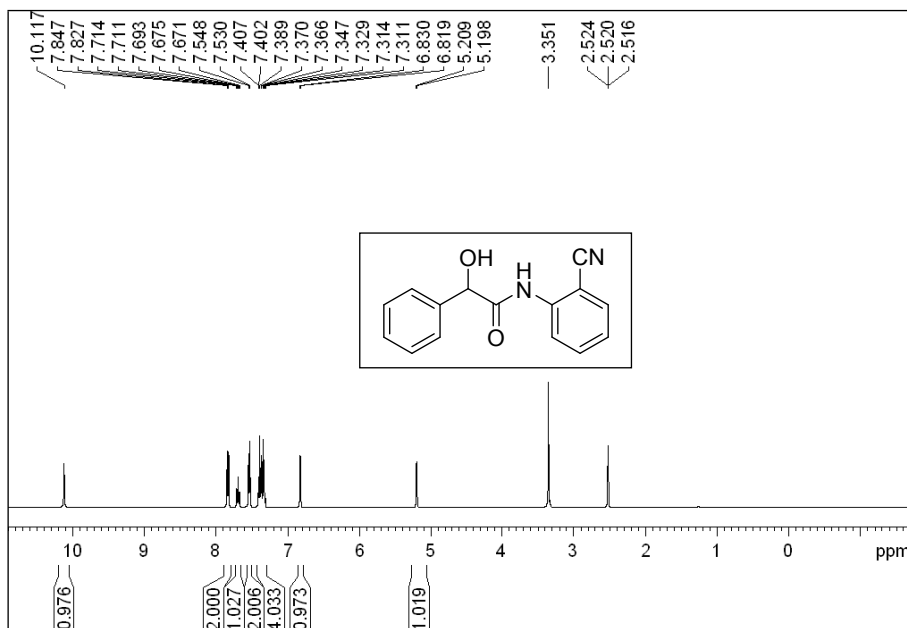

400 Mz  $^1\text{H}$ -NMR spectra of **2m** in  $\text{DMSO-}d_6$

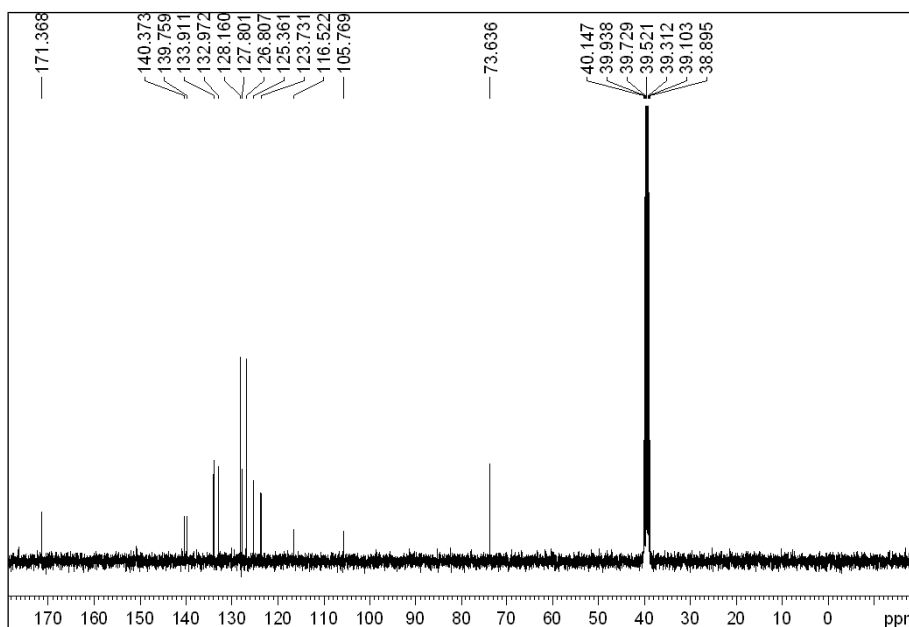

100 Mz  $^{13}\text{C}$ -NMR spectra of **2m** in  $\text{DMSO-}d_6$

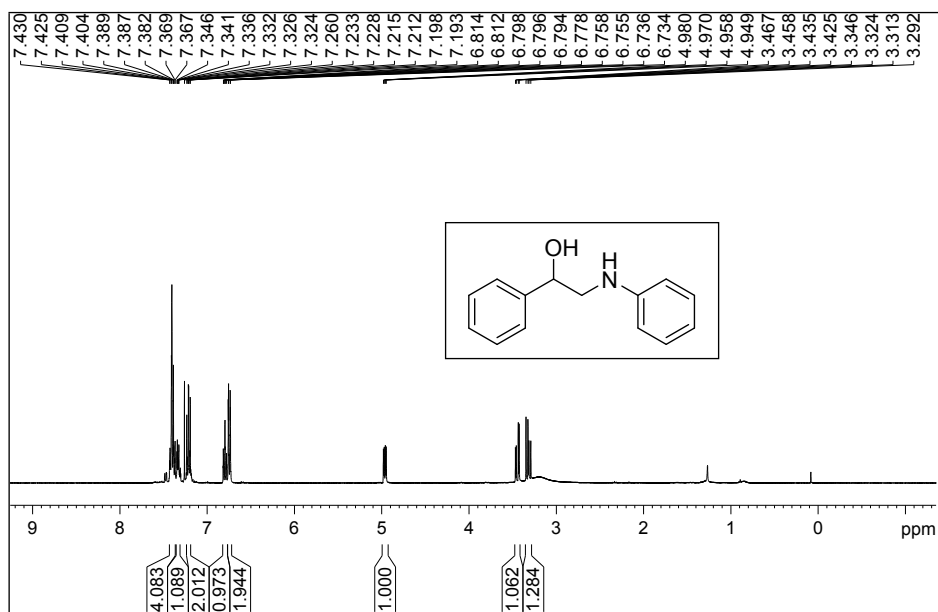

400 MHz  $^1\text{H}$ -NMR spectra of **3a** in  $\text{CDCl}_3$

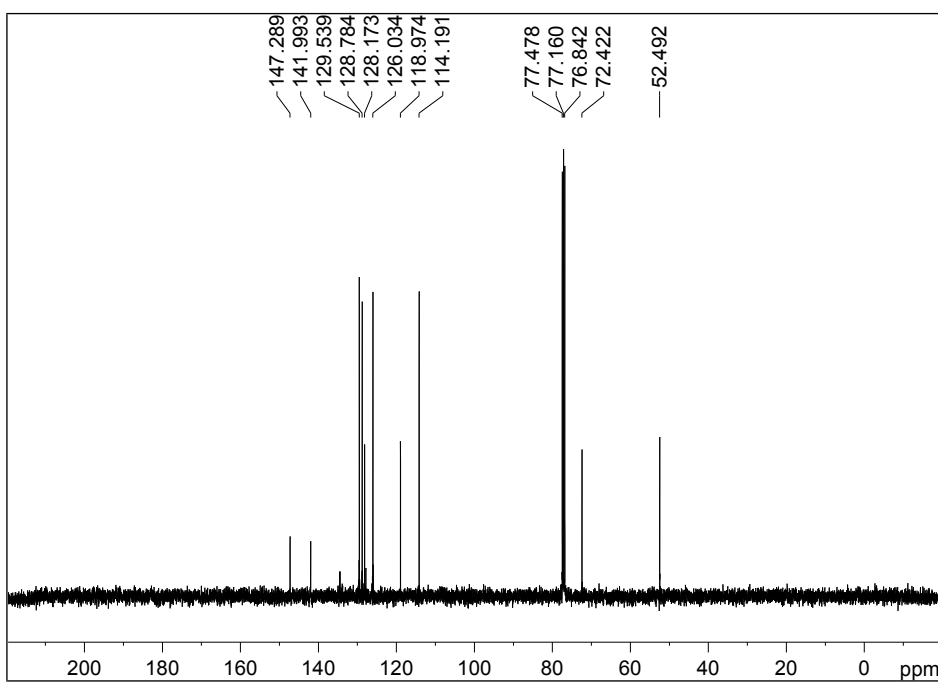

100 MHz  $^{13}\text{C}$ -NMR spectra of **3a** in  $\text{CDCl}_3$

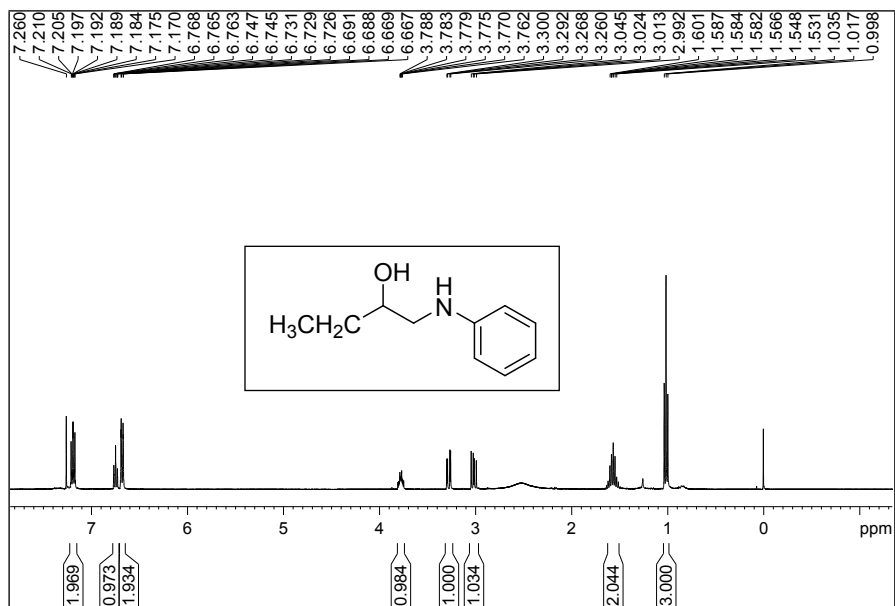

400 MHz  $^1\text{H}$ -NMR spectra of **3b** in  $\text{CDCl}_3$

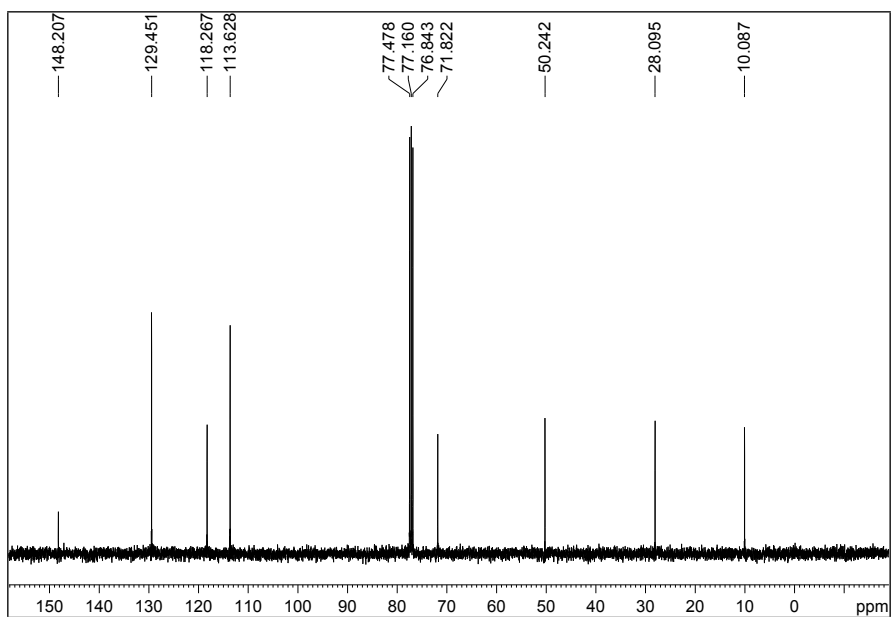

100 MHz  $^{13}\text{C}$ -NMR spectra of **3b** in  $\text{CDCl}_3$



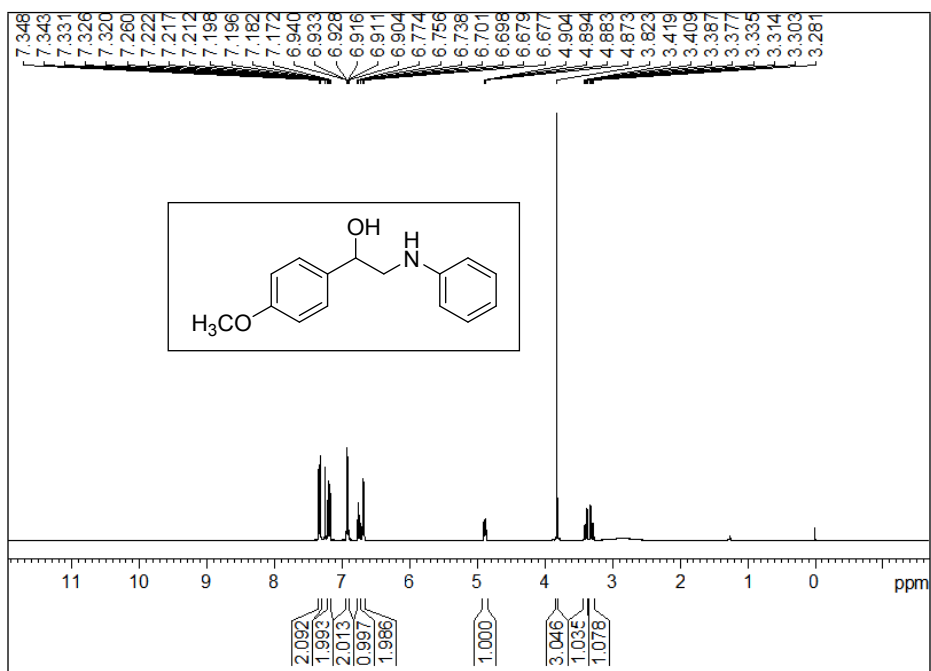

400 MHz  $^1\text{H}$ -NMR spectra of **3c** in  $\text{CDCl}_3$

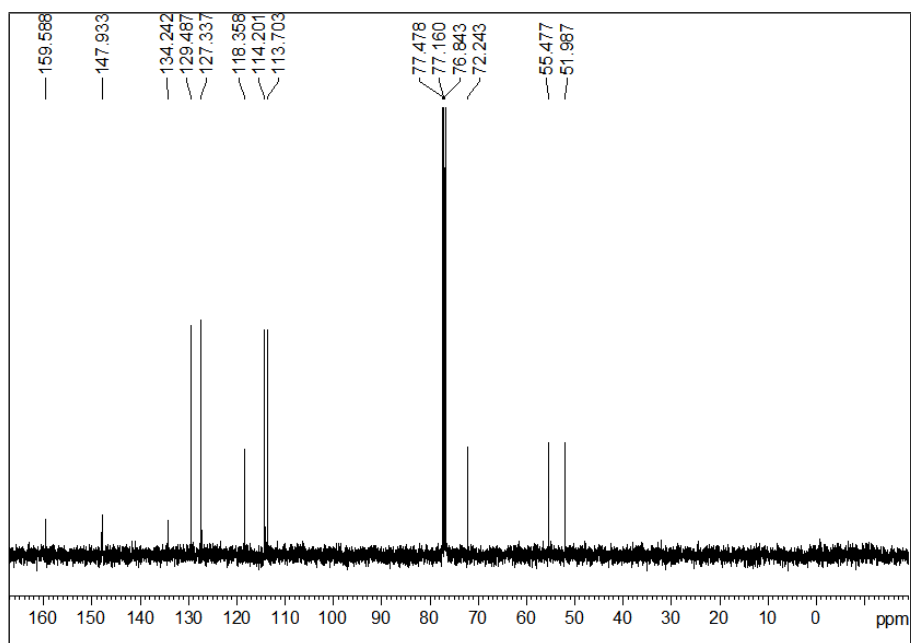

100 MHz  $^{13}\text{C}$ -NMR spectra of **3c** in  $\text{CDCl}_3$

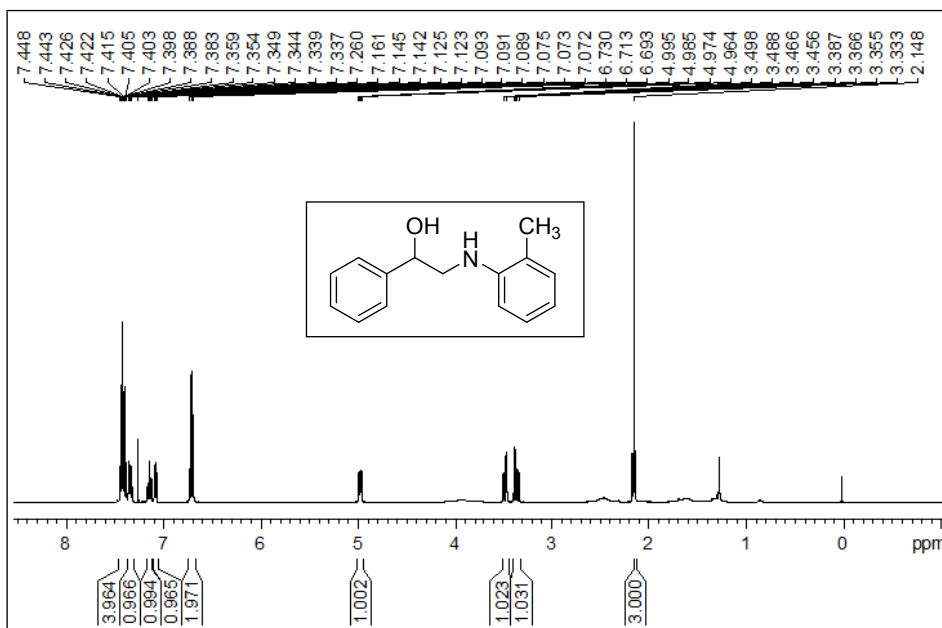

400 MHz  $^1\text{H}$ -NMR spectra of **3d** in  $\text{CDCl}_3$

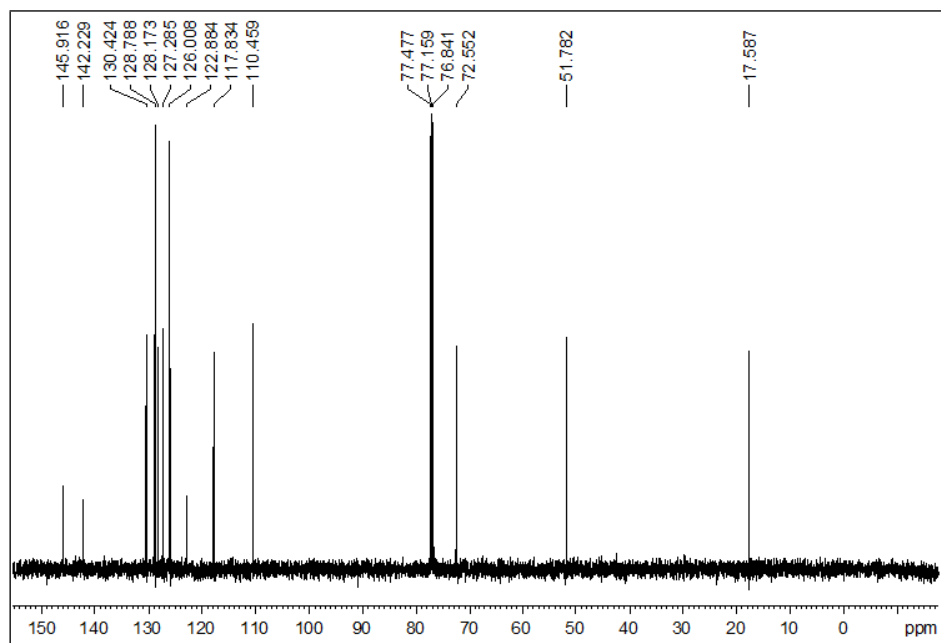

100 MHz  $^{13}\text{C}$ -NMR spectra of **3d** in  $\text{CDCl}_3$

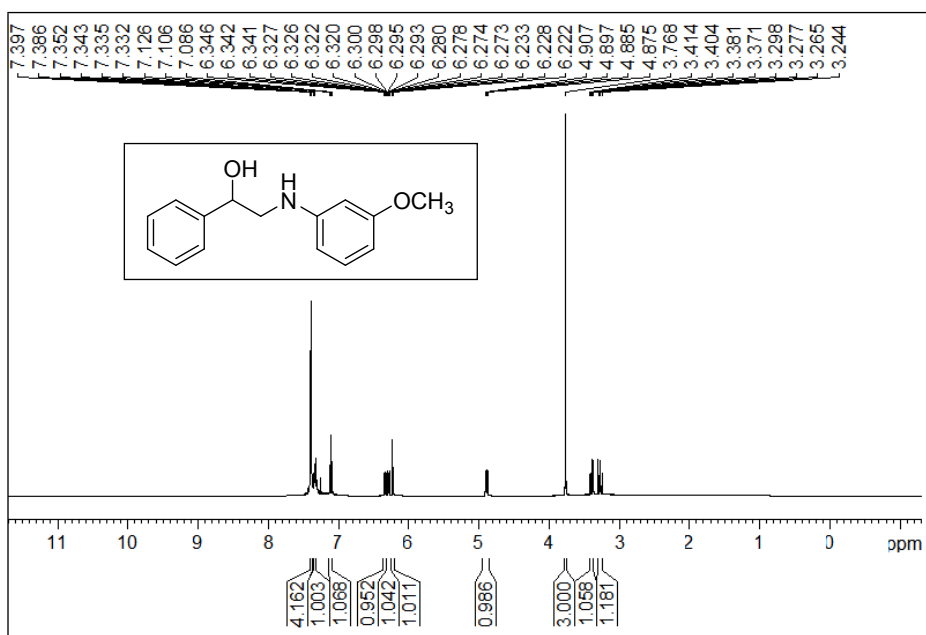

400 MHz  $^1\text{H}$ -NMR spectra of **3e** in  $\text{CDCl}_3$

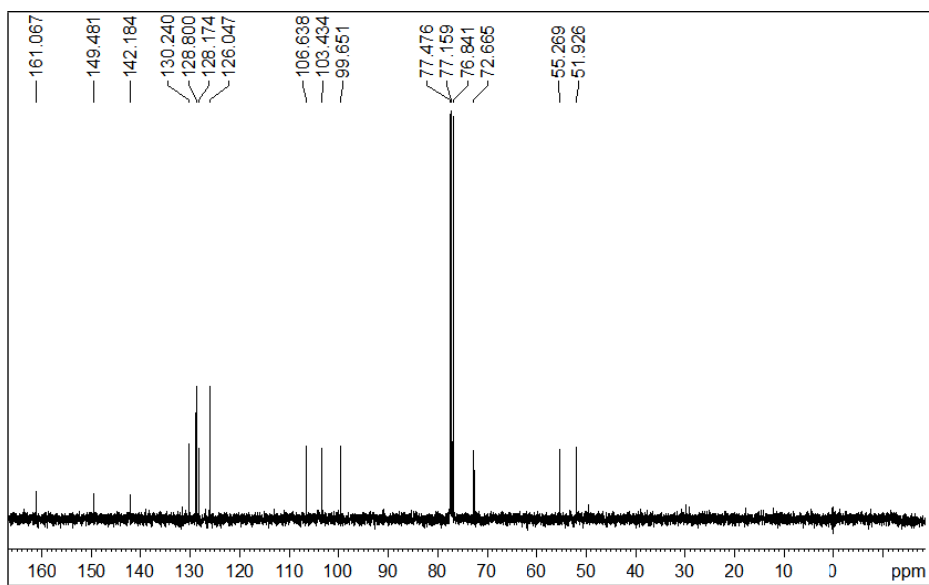

100 MHz  $^{13}\text{C}$ -NMR spectra of **3e** in  $\text{CDCl}_3$

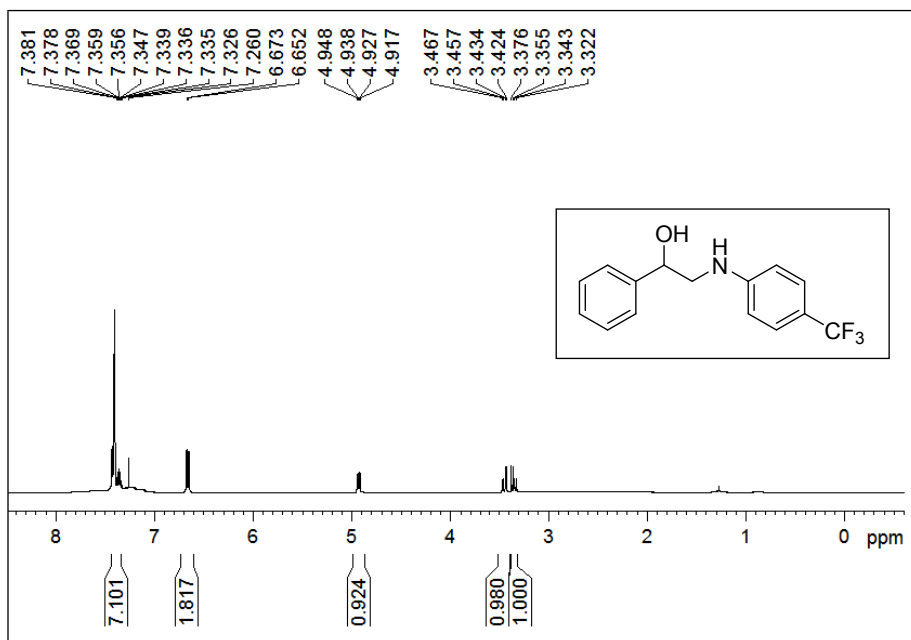

400 MHz  $^1\text{H-NMR}$  spectra of **3f** in  $\text{CDCl}_3$

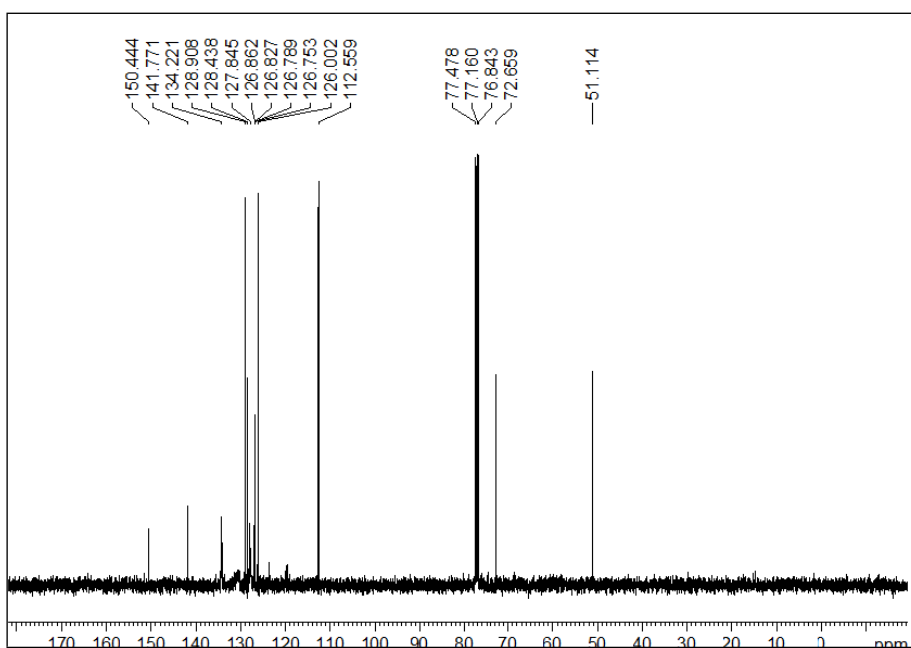

100 MHz  $^{13}\text{C-NMR}$  spectra of **3f** in  $\text{CDCl}_3$

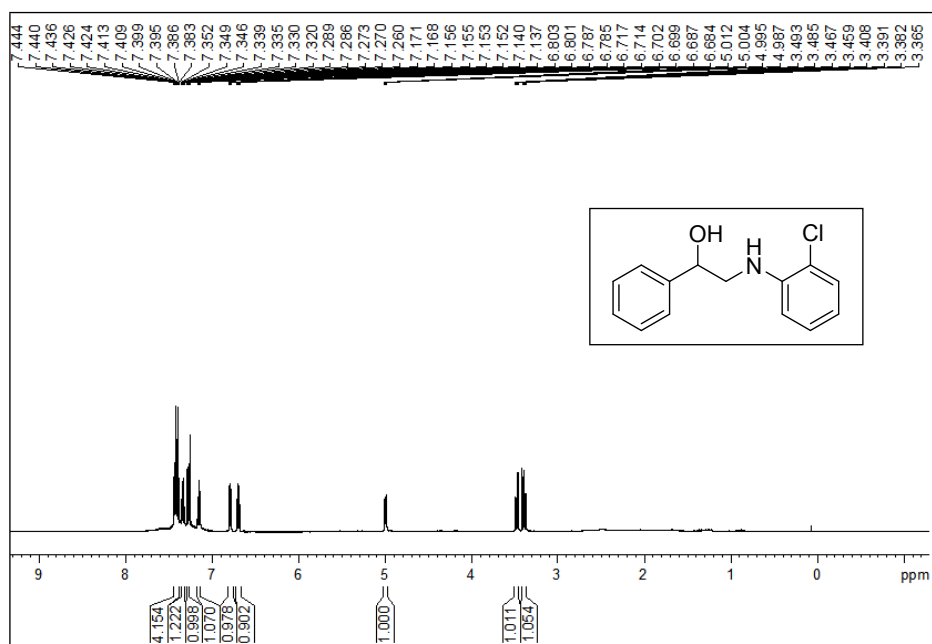

400 MHz <sup>1</sup>H-NMR spectra of **3g** in CDCl<sub>3</sub>

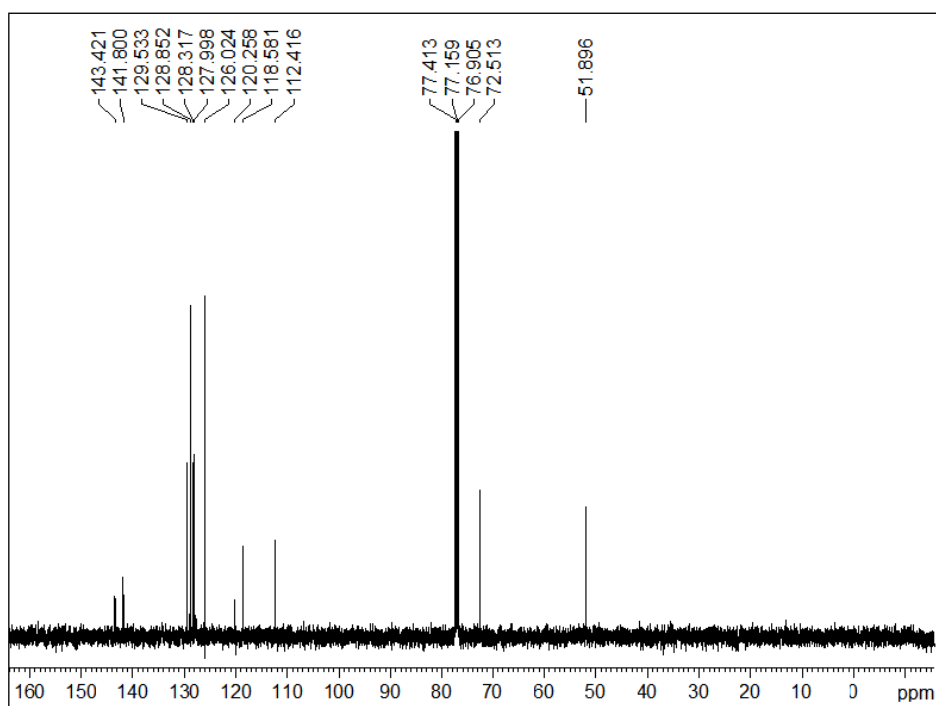

100 MHz <sup>13</sup>C-NMR spectra of **3g** in CDCl<sub>3</sub>

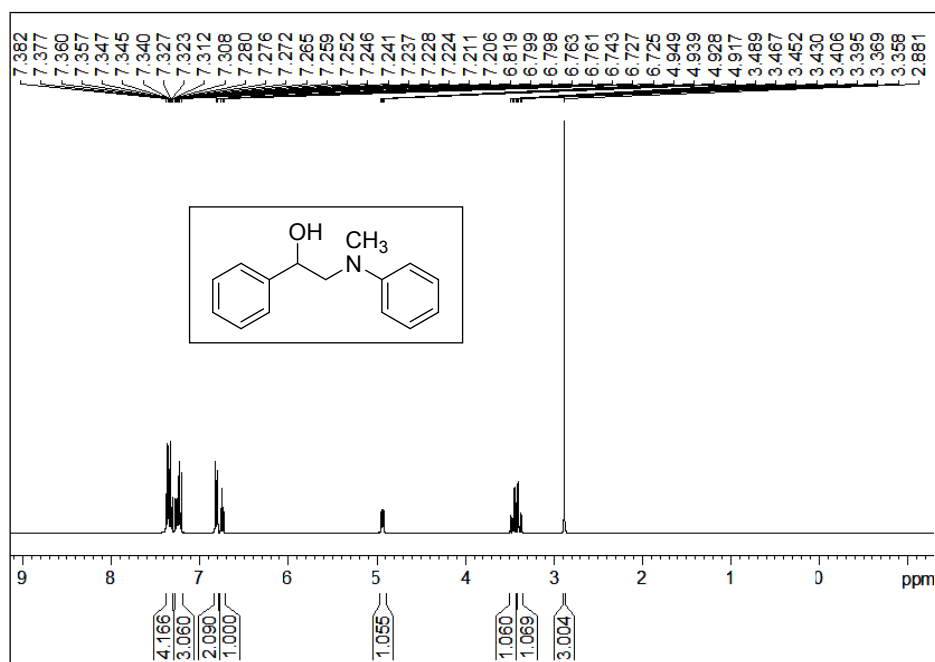

400 MHz  $^1\text{H}$ -NMR spectra of **3h** in  $\text{CDCl}_3$

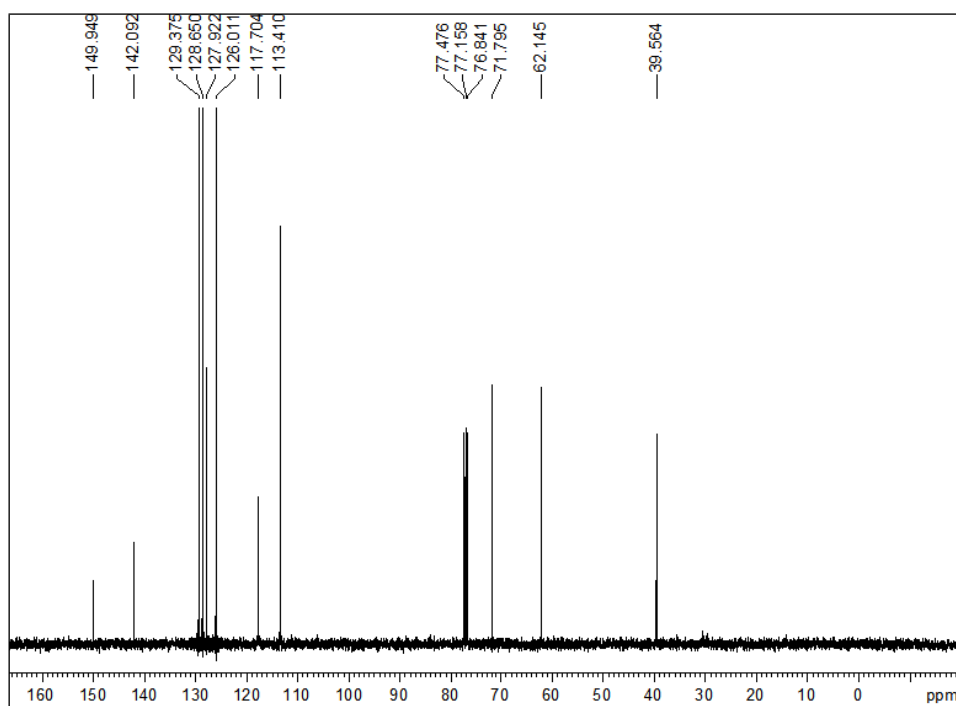

100 MHz  $^{13}\text{C}$ -NMR spectra of **3h** in  $\text{CDCl}_3$

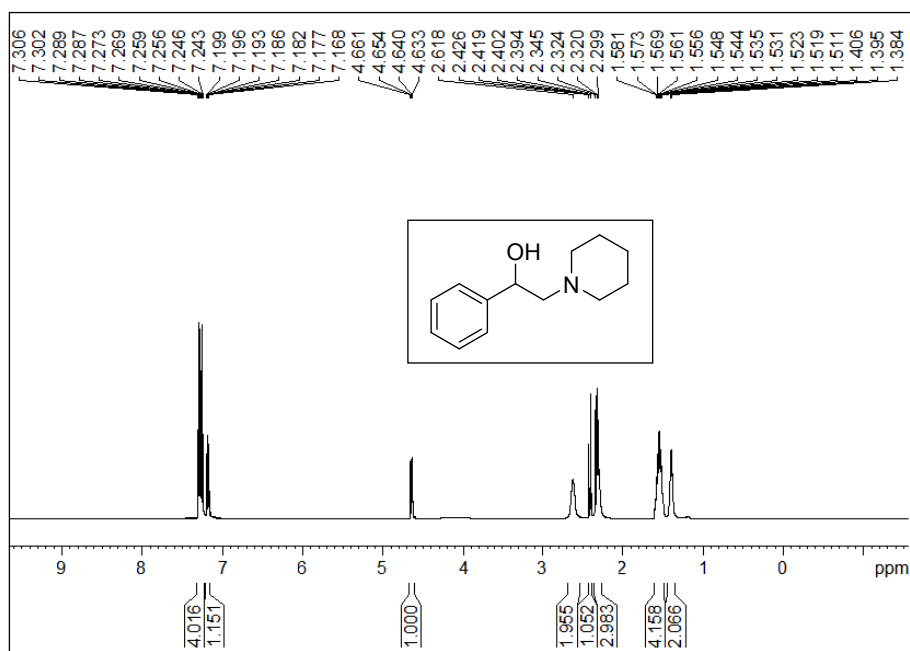

400 MHz  $^1\text{H}$ -NMR spectra of **3i** in  $\text{CDCl}_3$

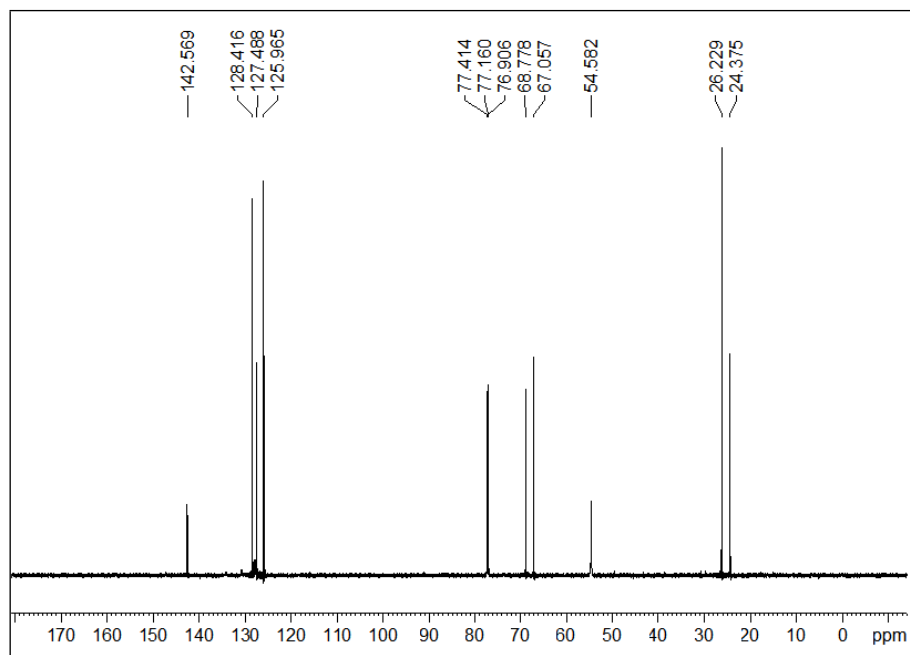

100 MHz  $^{13}\text{C}$ -NMR spectra of **3i** in  $\text{CDCl}_3$

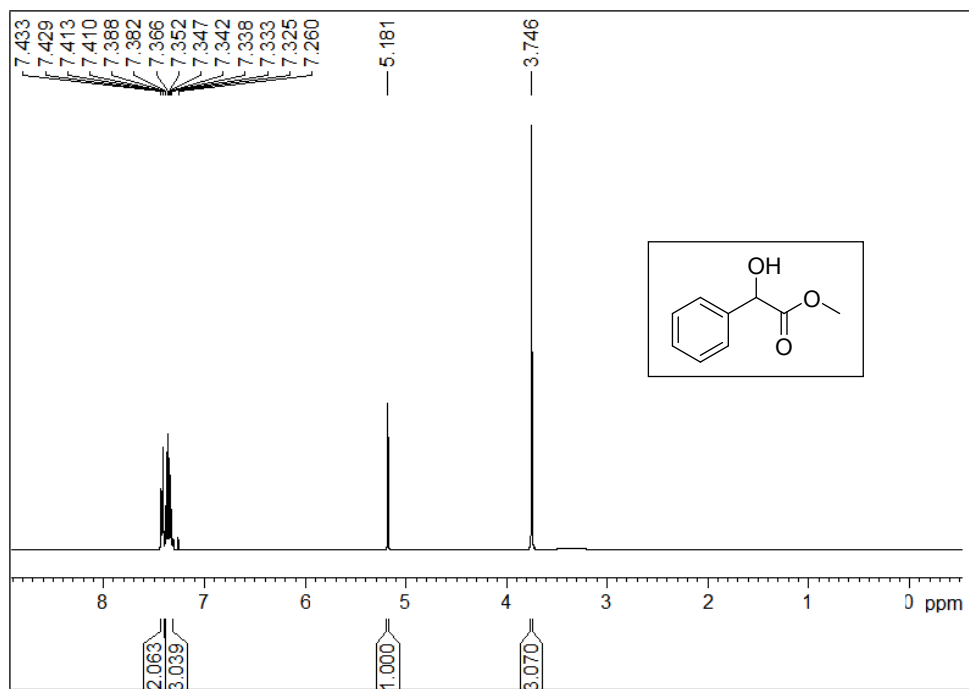

400 MHz  $^1\text{H}$ -NMR spectra of **18a** in  $\text{CDCl}_3$

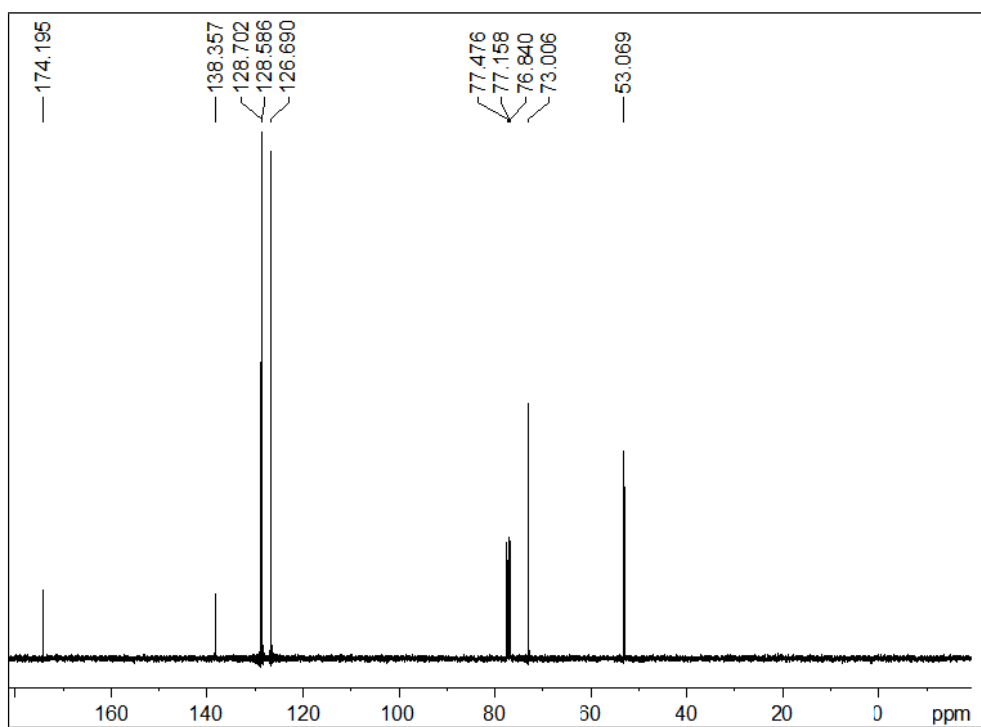

100 MHz  $^{13}\text{C}$ -NMR spectra of **5a** in  $\text{CDCl}_3$



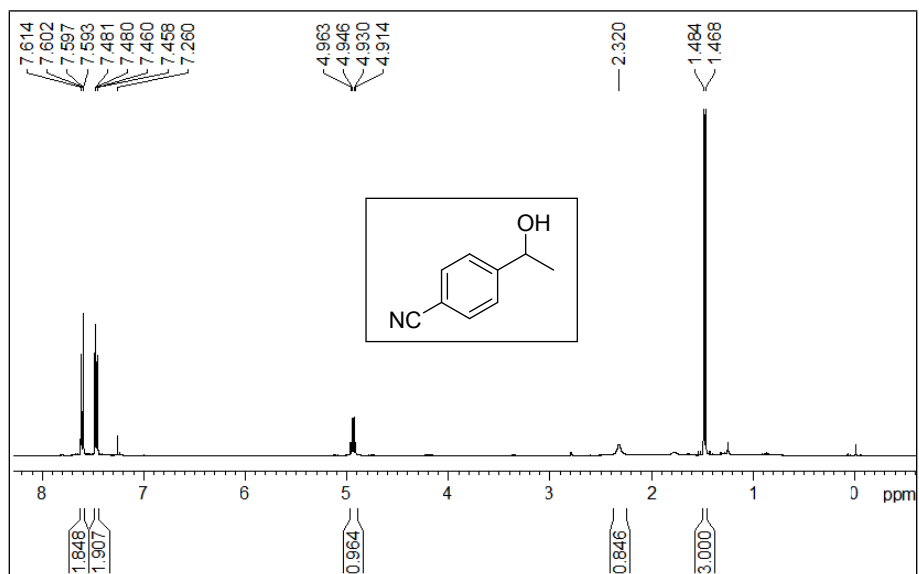

400 MHz  $^1\text{H}$ -NMR spectra of **18b** in  $\text{CDCl}_3$

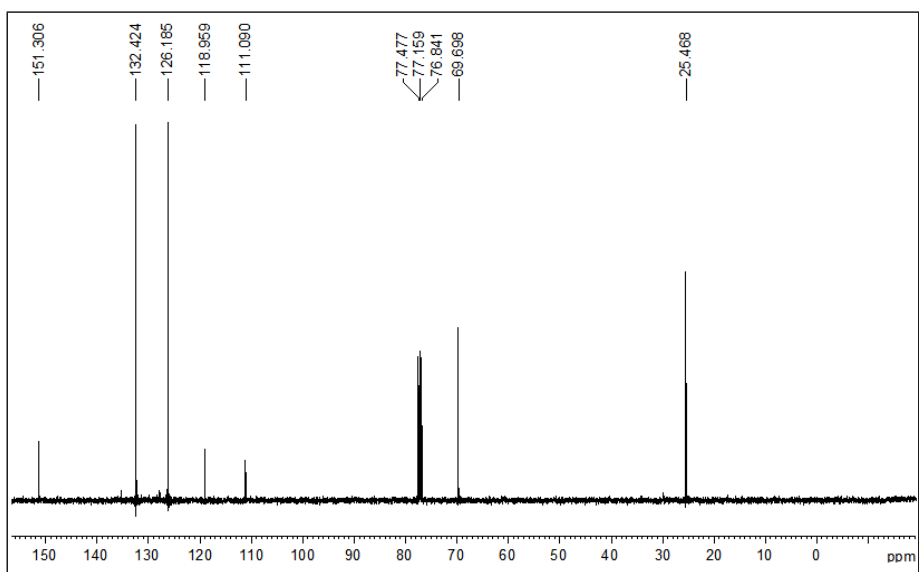

100 MHz  $^{13}\text{C}$ -NMR spectra of **18b** in  $\text{CDCl}_3$

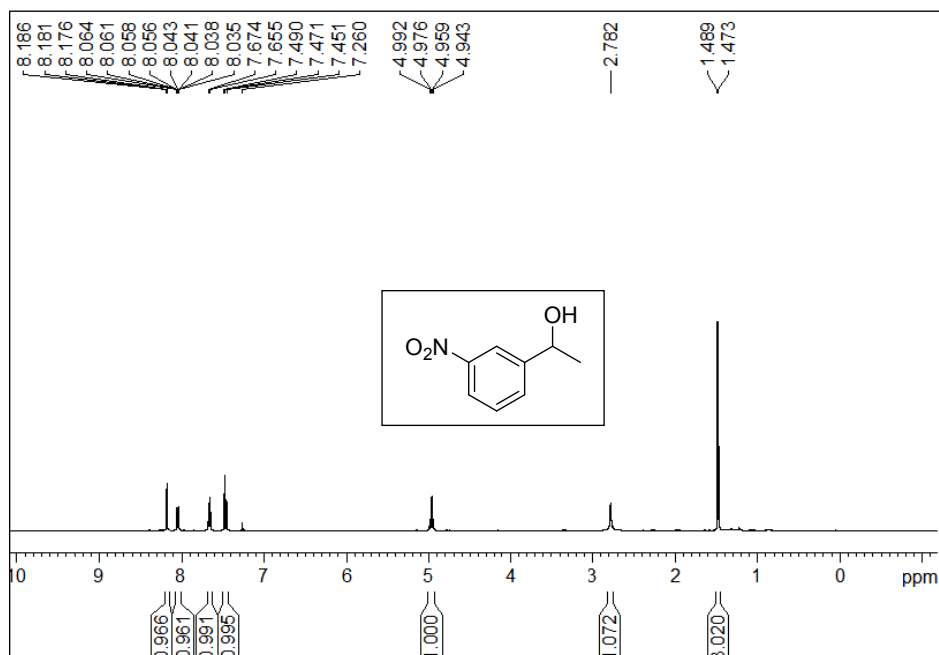

400 MHz  $^1\text{H}$ -NMR spectra of **18c** in  $\text{CDCl}_3$

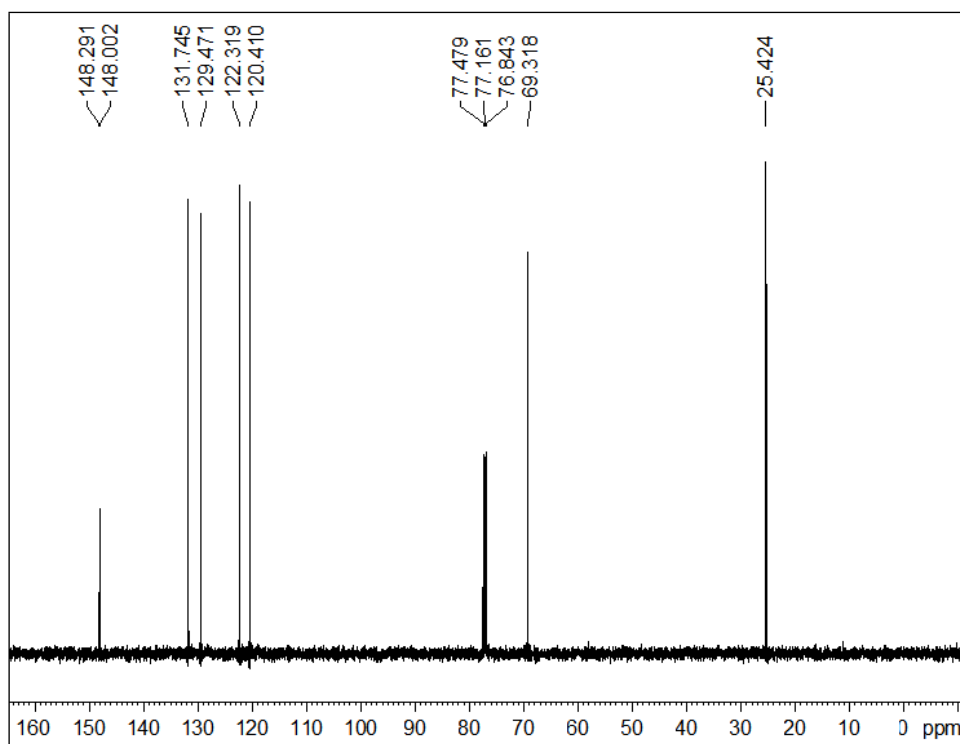

100 MHz  $^{13}\text{C}$ -NMR spectra of **18c** in  $\text{CDCl}_3$

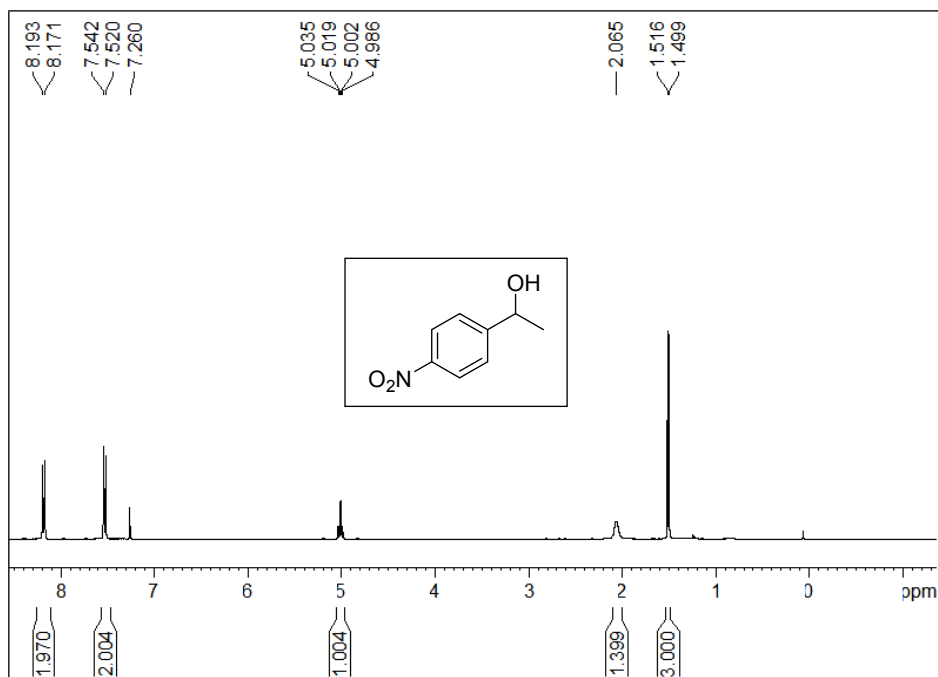

400 MHz  $^1\text{H-NMR}$  spectra of **18d** in  $\text{CDCl}_3$

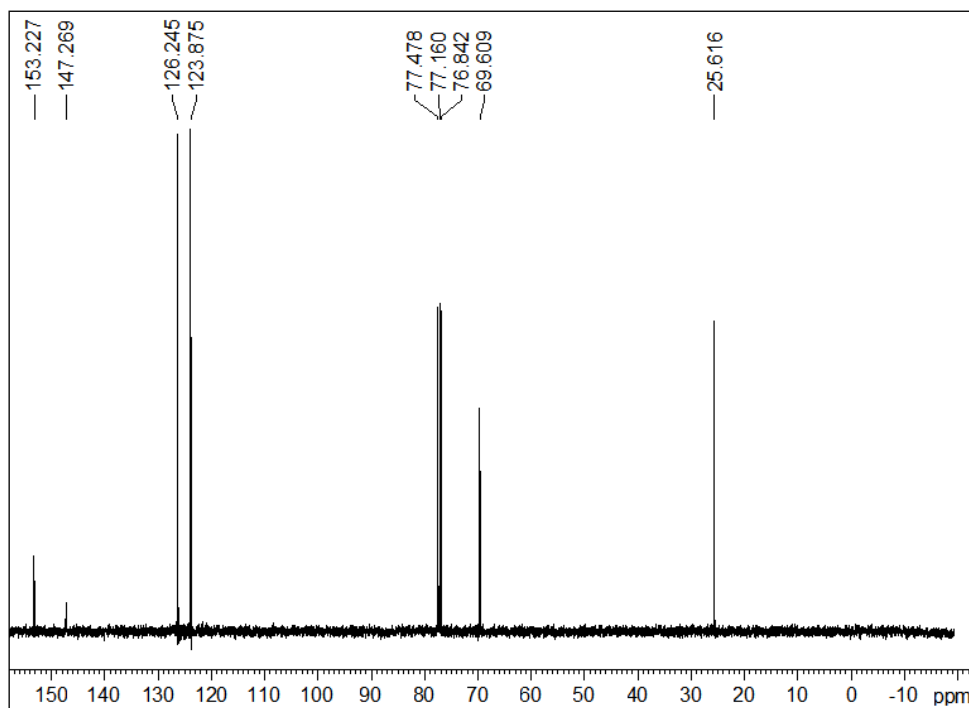

100 MHz  $^{13}\text{C-NMR}$  spectra of **18d** in  $\text{CDCl}_3$

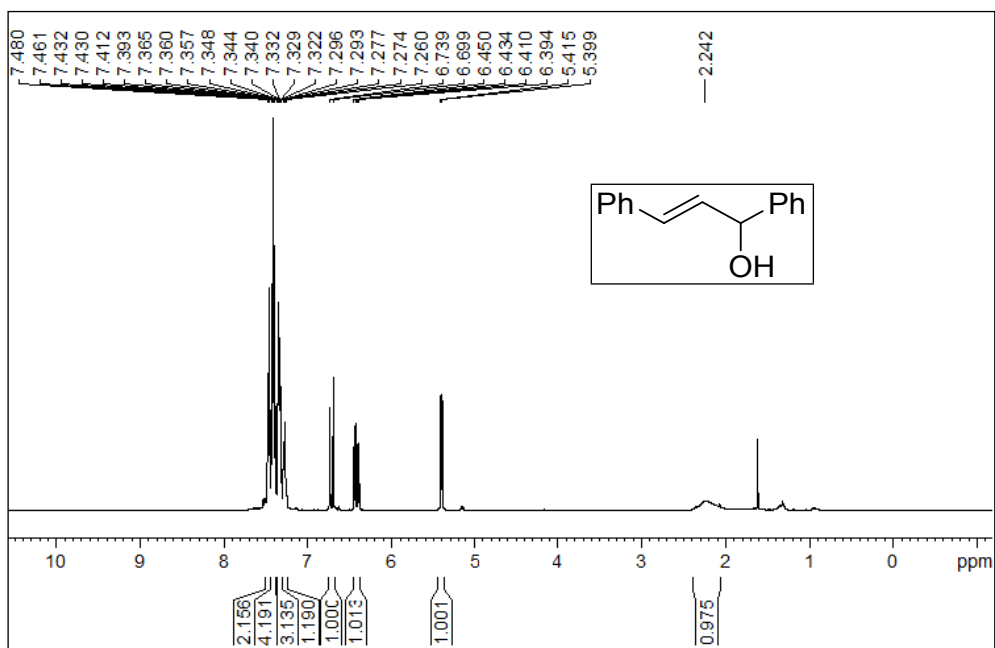

400 MHz  $^1\text{H}$ -NMR spectra of **18e** in  $\text{CDCl}_3$

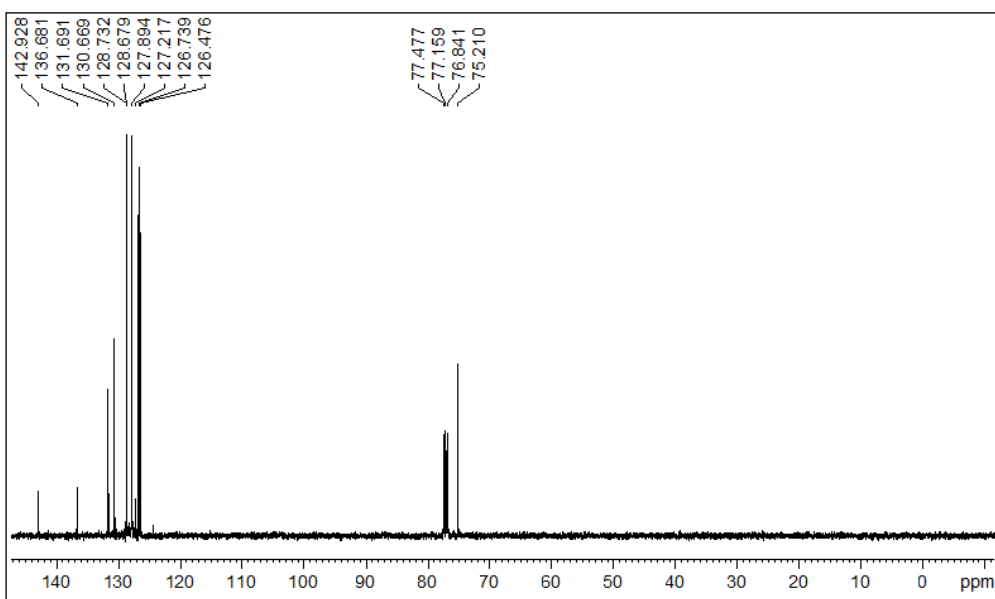

100 MHz  $^{13}\text{C}$ -NMR spectra of **18e** in  $\text{CDCl}_3$

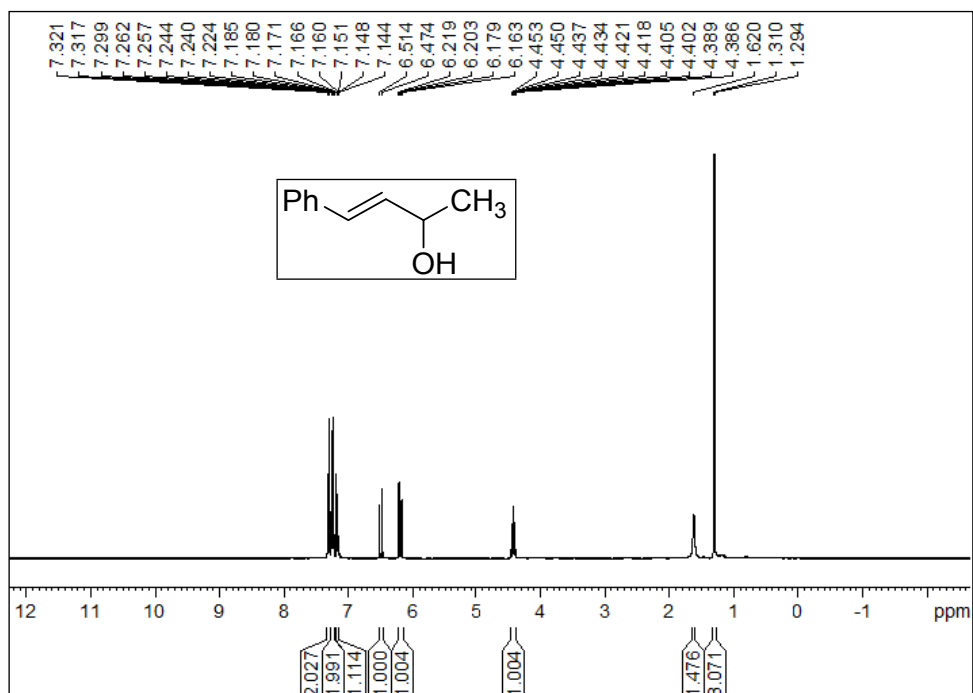

400 MHz  $^1\text{H}$ -NMR spectra of **18f** in  $\text{CDCl}_3$

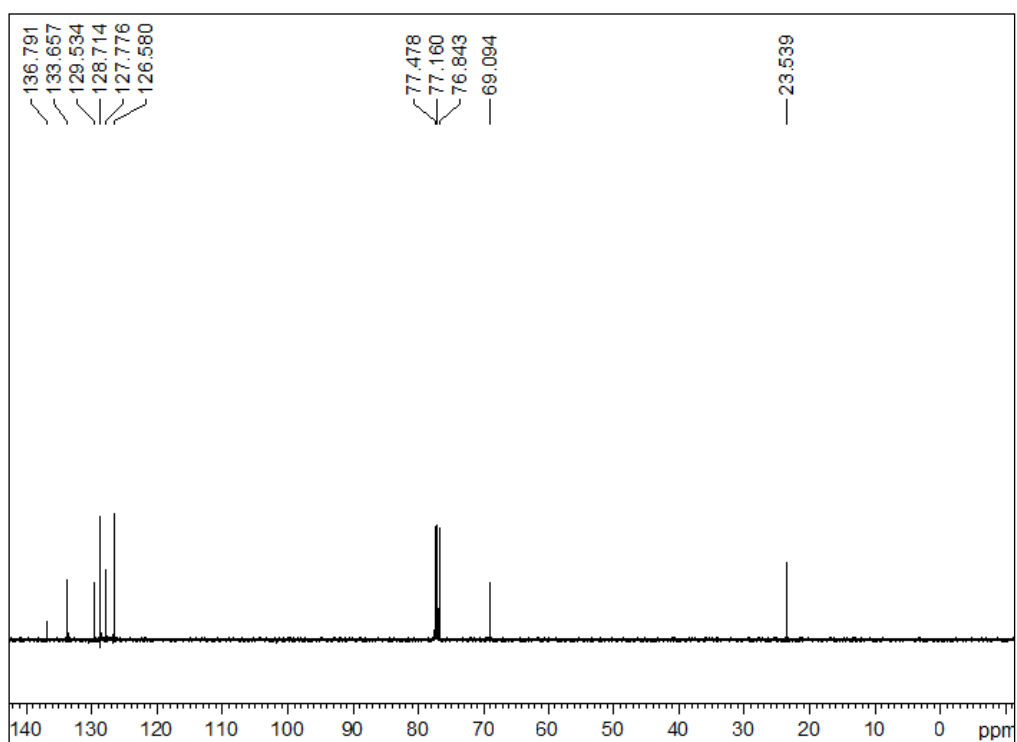

100 MHz  $^{13}\text{C}$ -NMR spectra of **18f** in  $\text{CDCl}_3$

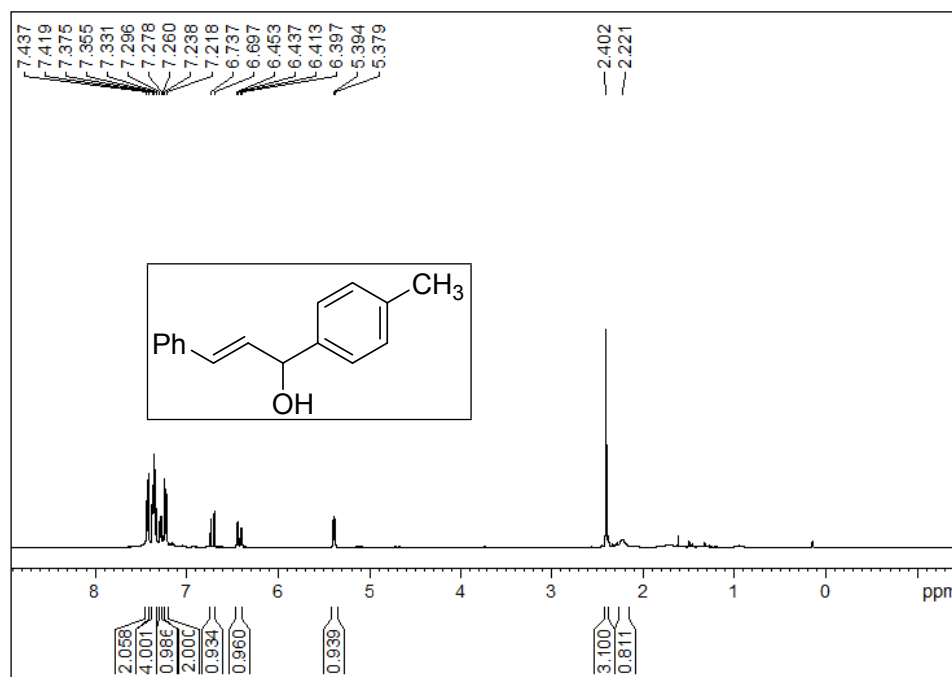

400 MHz  $^1\text{H}$ -NMR spectra of **18g** in  $\text{CDCl}_3$

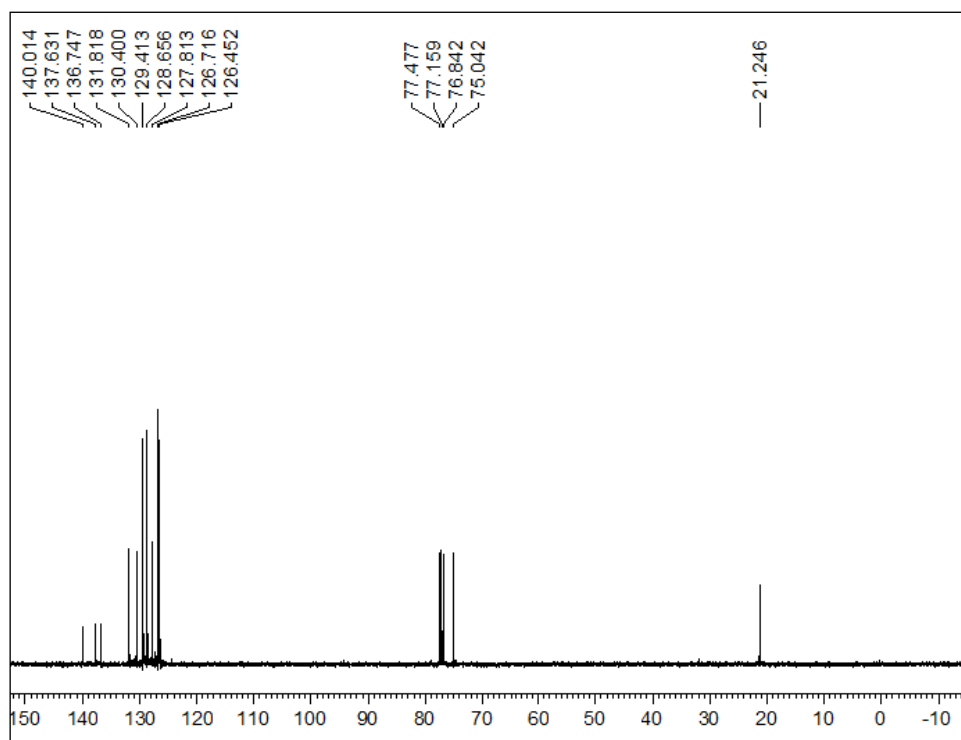

100 MHz  $^{13}\text{C}$ -NMR spectra of **18g** in  $\text{CDCl}_3$

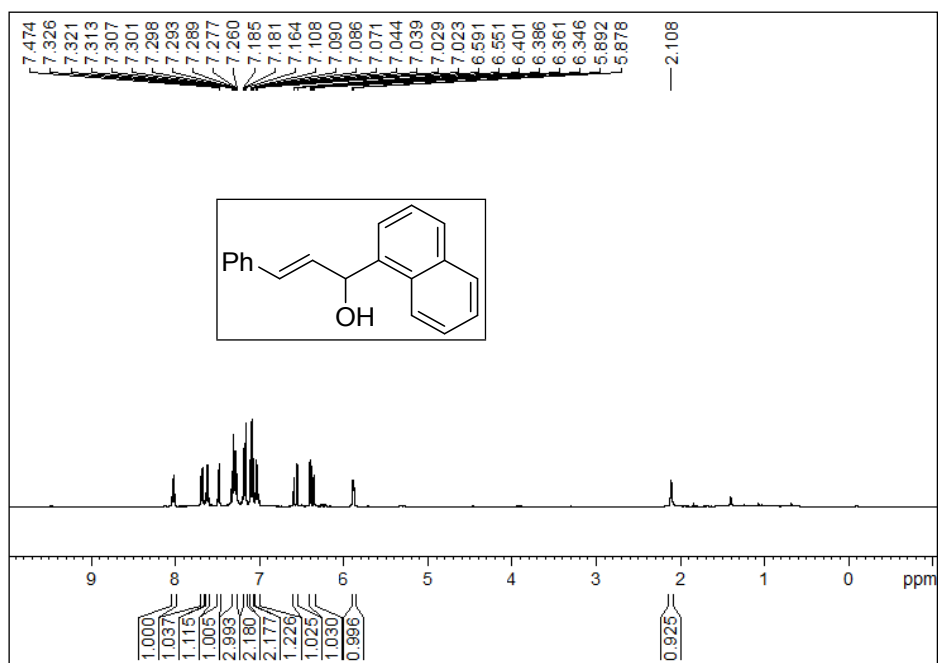

400 MHz  $^1\text{H}$ -NMR spectra of **18h** in  $\text{CDCl}_3$

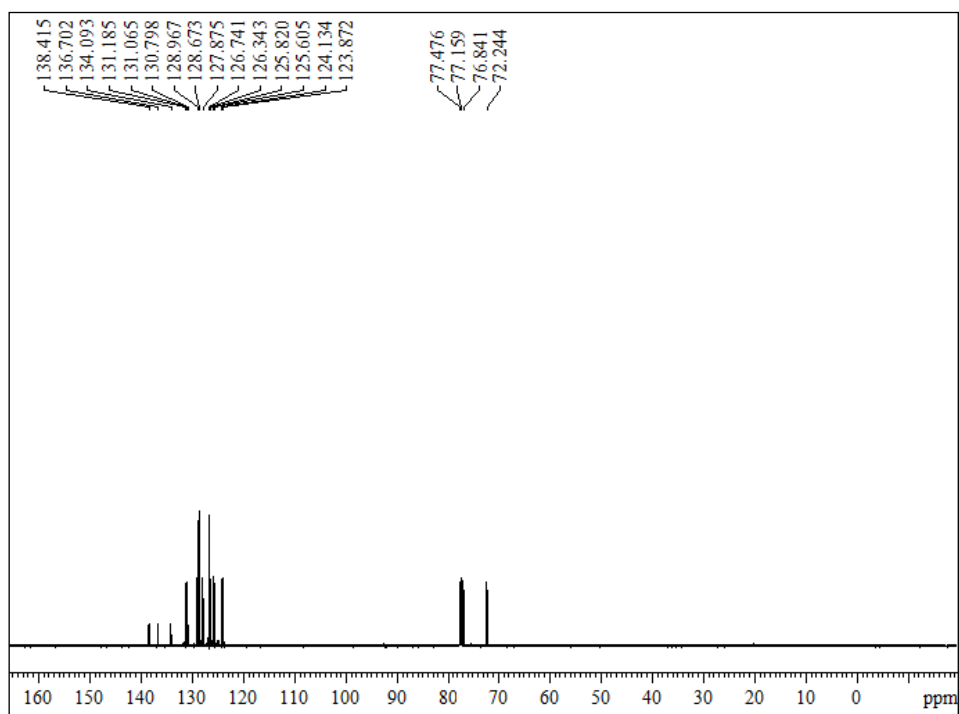

100 MHz  $^{13}\text{C}$ -NMR spectra of **18h** in  $\text{CDCl}_3$
